# Supplementary material for: Suboptimal prescribing of proton-pump inhibitors in low-dose aspirin users: a cohort study in primary care
Source: PubMed Central journal article supplement — BMJ Open. 2013 Jul 23;3(7):e003044. doi: 10.1136/bmjopen-2013-003044 (PMC3731714; doi:10.1136/bmjopen-2013-003044), 2013-07-23
Supplement: bmjopen-2013-003044.draft_revisions.pdf [file bmjopen-2013-003044.draft_revisions.pdf]

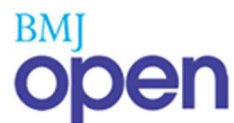

**Suboptimal prescribing of proton pump inhibitors in low-dose aspirin users in primary care.**

|                                 |                                                                                                                                                                                                                                                                                                |
|---------------------------------|------------------------------------------------------------------------------------------------------------------------------------------------------------------------------------------------------------------------------------------------------------------------------------------------|
| Journal:                        | <i>BMJ Open</i>                                                                                                                                                                                                                                                                                |
| Manuscript ID:                  | bmjopen-2013-003044                                                                                                                                                                                                                                                                            |
| Article Type:                   | Research                                                                                                                                                                                                                                                                                       |
| Date Submitted by the Author:   | 12-Apr-2013                                                                                                                                                                                                                                                                                    |
| Complete List of Authors:       | de Jong, Hilda; NIVEL, Korevaar, J; Netherlands Institute for Health Services Research (NIVEL), van Dijk, Liset; NIVEL, Voogd, Eef; NIVEL, Dijk, Christel; Netherlands Institute of Health Services Research NIVEL van Oijen, Martijn; UCLA, Center for Outcomes Research and Education (CORE) |
| <b>Primary Subject Heading</b>: | General practice / Family practice                                                                                                                                                                                                                                                             |
| Secondary Subject Heading:      | Gastroenterology and hepatology                                                                                                                                                                                                                                                                |
| Keywords:                       | PRIMARY CARE, GASTROENTEROLOGY, PREVENTIVE MEDICINE, Cardiology < INTERNAL MEDICINE                                                                                                                                                                                                            |
|                                 |                                                                                                                                                                                                                                                                                                |

SCHOLARONE™  
Manuscripts

Peer review only

1  
2  
3 **Suboptimal prescribing of proton pump inhibitors in low-dose aspirin users in primary**  
4 **care.**  
5

6  
7 Hilda JI De Jong, Joke C Korevaar, Liset Van Dijk, Eef Voogd, Christel E Van Dijk, Martijn  
8  
9 GH Van Oijen  
10

11  
12  
13  
14 **Affiliates**

15  
16 NIVEL, Netherlands Institute for Health Services Research, Utrecht, The Netherlands, Hilda  
17  
18 de Jong PhD-student, Joke Korevaar Research Coordinator General Practice Care, Liset van  
19  
20 Dijk Research Coordinator Pharmaceutical Care, Eef Voogd PhD-student, Christel van Dijk  
21  
22 Senior researcher.  
23

24  
25 Division of Digestive Diseases, David Geffen School of Medicine, UCLA, Los Angeles,  
26  
27 California, USA and UCLA/VA Center for Outcomes Research and Education (CORE), Los  
28  
29 Angeles, California, USA, Martijn van Oijen assistant professor.  
30  
31

32  
33  
34 **Corresponding author**

35 JC Korevaar  
36 P.O. Box 1568  
37 3500 BN Utrecht  
38 The Netherlands  
39 +31 30 27 29 711  
40 j.korevaar@nivel.nl  
41  
42

43  
44 **Keywords:** low-dose aspirin, proton pump inhibitors, GI complications, primary care  
45

46 **Wordcount:** 3089  
47

48 **Funding:** AstraZeneca; NIVEL  
49

50 **Short title:** suboptimal prescribing of PPIs in LDASA users in primary care  
51  
52  
53  
54  
55  
56  
57  
58  
59  
60

**Abstract****Objective**

Adherence to recommendations of concomitant PPI treatment in regular LDASA users, taking factors associated with the probability of receiving a PPI into account.

**Design**

Cohort study

**Setting**

Data were obtained from 120 Dutch primary care centres participating in the Netherlands Information Network of Primary Care (LINH).

**Participants**

Patients 18 years and older who were regularly prescribed LDASA (30-325 mg) in 2008-2010 were included.

**Main outcome measures**

Regular medication use was defined as receiving each consecutive prescription within 6 months after the previous one. Based upon national guidelines, we categorised LDASA users into low and high GI risk. A multilevel multivariable logistic regression analysis was applied to identify patient characteristics that influenced on the probability of regular PPI prescriptions.

**Results**

We identified 12,343 patients who started LDASA treatment, of whom 3,213 (26%) were at increased risk of GI complications. In this group, concomitant regular use of PPI was 46%, 36% did not receive PPI prescriptions and 18% obtained prescriptions irregularly ( $p < 0.0001$ ). The chance to obtain regularly PPI prescriptions versus no PPI was significantly influenced by, among others, previous GI complications (OR 13.9 [95%CI: 11.8 – 16.4]), use of NSAIDs (OR: 5.2 [4.3-6.3]), glucocorticosteroids (6.1 [4.6-8.0]), SSRIs (9.1 [6.7-12.2]), drugs for functional GI disorders (2.4 [1.9-3.0]) and increased age.

**Conclusion**

Primary care physicians do not fully adhere to the current recommendations to prescribe PPIs regularly to LDASA users with an increased GI risk. More than 50% of the patients with an increased GI risk are not treated sufficiently with a concomitant PPI, increasing the risk of gastrointestinal side effects. This finding underlines the necessity to consider merging recommendations into one common, standard and frequently used recommendation by primary care physicians.

## Article Summary

### *Article focus*

- LDASA use is associated with a wide variety of gastrointestinal (GI) side effects.
- Concomitant use of PPIs for patients who are at increased risk for GI complications is advised
- Adherence and persistence of PPI use in primary care of patients using LDASA frequently is still indefinite

### *Key messages*

- Primary care physicians do not fully adhere to the current recommendations to prescribe PPIs regularly to LDASA users with an increased GI risk
- Concomitant regular use of PPI with LDASA in patients with an increased GI risk was 46% in primary care
- 36% of the LDASA users with an increased GI risk and treated in primary care, obtained no PPI prescriptions, and 18% obtained prescriptions irregular

### *Strengths and limitations of this study*

- Large representative sample of patients monitored in daily practice in primary care
- No information available why patients with an increased GI risk did not obtain PPI prescriptions, or why they became an irregular PPI user

## Introduction

Worldwide, the number of deaths from cardiovascular disease was estimated at 17.3 million in 2008, and it is expected to increase to approximately 23.6 million by 2030<sup>1</sup>. Treatment with low-dose of aspirin (LDASA) is recommended for the prevention of cardiovascular events in patients with a history of myocardial infarction, stroke, transient ischaemic attack or (in)stable angina<sup>2-4</sup>. While LDASA use is associated with a decreased risk of cardiovascular events<sup>5</sup>, its use is also associated with a wide variety of gastrointestinal (GI) side effects, such as dyspepsia, peptic ulcers, and upper and lower GI bleedings<sup>6;7</sup>.

GI complications associated with LDASA use are more frequently present in patients who are older than 70 years, have a history of peptic ulcer, have had an infection with *Helicobacter pylori*, and/or used concomitant drug therapies with non-steroidal anti-inflammatory drugs (NSAIDs), including cyclooxygenase-2 (COX-2) inhibitors, other antiplatelet agents or anticoagulants, glucocorticosteroids, and/or selective serotonin reuptake inhibitors (SSRIs)<sup>6;7</sup>. Concomitant proton pump inhibitor (PPI) therapy is associated with a reduction of the risk of GI complications<sup>8-11</sup>.

Therefore, concomitant use of PPIs for patients who use regular LDASA and are at increased risk for GI complications has been described in guidelines from medical societies and scientific associations from both the USA and Europe<sup>12;13</sup>. In the Netherlands - the setting of our study - an expert group with a focus on optimising extramural medication safety published specific recommendations for adequate gastrointestinal protection, i.e. prescribing PPIs in regular LDASA users with an increased risk of GI complications in 2008, which was finalised in 2009<sup>14</sup>. These recommendations are in line with the US, NICE and ESC guidelines<sup>12;13;15</sup>, and describe that PPIs are the preferred agents for the therapy and

1  
2  
3 prophylaxis of aspirin-associated GI injury<sup>12</sup>. Risk reduction due to PPI treatment observed in  
4  
5 case-control and cohort studies ranged in most cases from 40 to 80%.<sup>16</sup>  
6  
7

8  
9  
10 Several observational studies described the use of concomitant PPI in a patients receiving  
11  
12 NSAID including aspirin, and showed that 67-90% of the users with at least one risk factor  
13  
14 did not receive gastroprotective therapy as recommended<sup>17 18;19</sup>. Two studies focussed on  
15  
16 LDASA patients; in one study the definition of increased GI risk was limited, namely a  
17  
18 positive *Helicobacter pylori* status, the other study had a small sample size of LDASA  
19  
20 patients.<sup>20;21</sup>. Although evidence regarding the adherence to concomitant PPI use in patients  
21  
22 with an increased risk for GI complications is increasing, the adherence and persistence of PPI  
23  
24 use is still indefinite.  
25  
26

27  
28  
29 The objective of this study is to determine the adherence to recommendations of concomitant  
30  
31 PPI treatment in regular LDASA users, taking factors associated with the probability of  
32  
33 receiving a PPI into account.  
34  
35  
36  
37  
38  
39  
40  
41  
42  
43  
44  
45  
46  
47  
48  
49  
50  
51  
52  
53  
54  
55  
56  
57  
58  
59  
60

## Methods

Data were obtained from the Netherlands Information Network of Primary Care Physicians (LINH), a database derived from primary care centres that record data on morbidity, and drug prescriptions on continuous basis in electronic medical records (EMR). The LINH network consists of a dynamic cohort of 700,000 patients who are registered at 120 centres<sup>22</sup>. The network is a representative sample of the Dutch population, it started in 2001 and registration is still on-going.<sup>22</sup> In the Netherlands, all citizens are registered with a primary care physician who act as a gatekeeper for access to specialised care<sup>23</sup>.

Prescription data were classified according to the Anatomical Therapeutic and Chemical (ATC) classification<sup>24</sup>, and morbidity was coded by using the International Classification of Primary Care (ICPC) scheme<sup>25</sup>. The privacy regulation of LINH was approved by the Dutch Data Protection Authority. According to Dutch legislation, neither obtaining informed consent nor approval by a medical ethics committee is obligatory for database studies.

In this longitudinal, observational study, all patients aged 18 years and older who started with regular use of LDASA (30-325 mg) treatment between January 1, 2008, and December 31, 2010 were included under the condition that their history was available at least one year before the date of the first prescription of LDASA. This time period was chosen to confirm that no LDASA prescriptions were given in the year prior to inclusion. Regular use of LDASA was defined as receiving each consecutive prescription within six months after the previous one. A gap of maximal six months was chosen because in daily practice patients rarely collect a subsequent prescription exactly on the day their supply of their previous prescription has ended, normally 90 days, but rather earlier (overlap of two prescriptions) or later (gap between two prescriptions). In order not to bias our results towards irregular user



1  
2  
3 categorisation, we used a maximum period of six months. Aspirin therapy was identified by a  
4  
5 prescription of acetylsalicylic acid (ATC-codes B01AC06, N02BA01 and N02BA51),  
6  
7 carbasalate calcium (B01AC08, N02BA15 and N02BA65), or acetylsalicylic acid in  
8  
9 combination with other drugs (B01AC30).  
10

11  
12  
13  
14 Based upon the HARM-WRESTLING recommendations<sup>14</sup>, we categorised new LDASA  
15  
16 users into low or increased risk of GI complications. Patients with an increased risk of GI  
17  
18 complications were identified by the following selection rules applied in consecutive order: 1)  
19  
20 80 years or older; 2) 70 years or older with simultaneous use of NSAIDs, oral anticoagulants,  
21  
22 platelet aggregation inhibitors, glucocorticosteroids, SSRIs and/or spironolacton; or 3) 60  
23  
24 years or older with a history of a peptic ulcer.  
25  
26  
27

28  
29 PPI treatment was identified by ATC-code A02BC. All patients were divided into three  
30  
31 categories: *no user*, *irregular*, or *regular* user of PPIs. Patients who never received a  
32  
33 prescription of PPI during the follow-up period were defined as *no PPI users*. In line with our  
34  
35 definition of a regular LDASA user, patients were defined as *regular PPI users* if they  
36  
37 received each consecutive prescription within 6 months after their previous one. All others  
38  
39 were considered as *irregular users*.  
40  
41  
42

43  
44  
45 We considered patients to be *previous starters of PPIs* when they received a prescription of  
46  
47 PPI in the year prior to the first prescription of LDASA. Patients who started the use of PPIs  
48  
49 within a week after the first prescription of LDASA were considered as *simultaneous starters*  
50  
51 *of PPIs*. Patients who received a prescription of PPI more than a week after the first  
52  
53 prescription of LDASA were *subsequent starters of PPIs*.  
54  
55  
56  
57  
58  
59  
60

1  
2  
3 Relevant co-morbidity was determined in the year before and after the date of the first  
4  
5 prescription of LDASA. Cardiovascular and cerebrovascular diseases were identified by  
6  
7 ICPC-codes K71, K73-K84, K89-K96 and K99. Hypertension was considered present when  
8  
9 the patient had a medical record of ICPC-codes K86 or K87. Patients were classified as  
10  
11 diabetic if a diagnosis code for diabetes (T90) was identified, or when they received anti-  
12  
13 diabetic therapy (ATC-codes A10A and A10B). Patients who had a diagnosis of lipid disorder  
14  
15 (T93) or when they received lipid modifying agents (C10) were considered as  
16  
17 hypercholesterolaemic. GI complications, including peptic ulcers, were identified by D02,  
18  
19 D03, D09, D10, D14, D16, D85-87, and D90 (Appendix I).  
20  
21  
22  
23  
24

25 To classify patients as having an increased GI risk based on HARM-WRESTLING  
26  
27 recommendation, we determined prescriptions for NSAIDs (M01), including Cox-2  
28  
29 inhibitors, oral anticoagulants and platelet aggregation inhibitors (B01AA and B01AC),  
30  
31 glucocorticosteroids (H02AB and H02), and SSRIs (N06AB) [16]. In addition, we identified  
32  
33 all prescriptions for cardiovascular system (C01-C10), acid related disorders (A02 (PPIs  
34  
35 excluded)), and functional gastro-intestinal disorders (A03) in the year before and after the  
36  
37 date of the first LDASA prescription.  
38  
39  
40  
41  
42

### 43 *Statistical analysis*

44  
45 To identify the relative influence of patient characteristics on the probability to obtain regular  
46  
47 PPI prescriptions, multilevel multivariable logistic regression analyses (backward elimination  
48  
49 method) was conducted. The models were estimated taking the clustering of patients (level 1)  
50  
51 within primary care centres (level 2) into account. The probability of receiving a PPI was  
52  
53 determined by comparing no PPI users with regular PPI users. This analyses was performed  
54  
55 without the irregular users to rule out the effect of these users. In addition, separate analyses  
56  
57  
58  
59  
60

1  
2  
3 were performed for increased GI risk patients. All data were analysed using the statistical  
4  
5 programs SAS version 9.2 (SAS Institute, Cary, North Carolina) and 'Multilevel models for  
6  
7 windows' (MLwin 2.02). Adjustment for multiple testing was performed by using a False  
8  
9 Discovery Rate correction.  
10

11  
12  
13 Choices of our definition of subsequent and simultaneous start of PPIs, and our period of  
14  
15 describing patients' characteristics were based on assumptions, and therefore we tested the  
16  
17 robustness of our findings by performing sensitivity analyses. We made the definition of  
18  
19 simultaneous starters of PPIs more strictly, i.e. receiving a prescription of PPIs at exactly the  
20  
21 same date as the first prescription of LDASA. Secondly, we changed the medical and  
22  
23 prescription history into only one year before the date of the first LDASA prescription.  
24  
25 Thirdly, as LDASA therapy was frequently prescribed for patients with cardiovascular  
26  
27 diseases, a separate analysis with solely cardiovascular patients was conducted. Finally, we  
28  
29 investigated the influence of irregular users of PPIs into our analysis by performing two  
30  
31 analyses in which we (1) merged irregular users with regular users of PPIs and in which we  
32  
33 (2) added irregular users to the no PPI users group.  
34  
35  
36  
37  
38  
39

#### 40 *Role of the funding source*

41  
42 The sponsor of the study had no decisive role in design and conduct of the study, collection,  
43  
44 analysis, or interpretation of the data, or decision to submit the manuscript for publication.  
45  
46 JK and LvD had full access to all data in the study and take responsibility for the integrity of  
47  
48 the data and accuracy of the data analysis. All authors had final responsibility for the decision  
49  
50 to submit for publication  
51  
52  
53  
54  
55  
56  
57  
58  
59  
60

## Results

In the study population, 18,137 new LDASA users of 18 years and older were identified of whom 12,343 were regular users during the years 2008-2010 (Figure 1). Of these incident regular LDASA users, 3,213 (26.0%) were at increased risk for GI complications. The vast majority was at an increased GI risk due to their age. In total, 64.5% of the patients who were at increased GI risk obtained a PPI prescription; 46.1% was a regular and 18.4% an irregular user. In the group of patients with an increased GI risk without PPI prescription, the main reason for having an increased GI risk was age, above 80 years (n=994, 87%). Cardiovascular diseases are reported in almost half of the patients, and are significantly more prevalent among patients with increased GI risk (49.3% vs. 46.0%, p=0.002). The use of co-medication is generally higher in the increased GI risk group, with the exception of lipid modifying agents (Table 1).

In total, 4,204 (34.1%) patients were regular PPI users, 2,456 (19.9%) were irregular users, and 5,683 (46.0%) used no PPI (Table 2). Of the regular PPI users nearly half of the patients (48%) started PPI therapy previously, 25% started PPI therapy simultaneously, and 27% started subsequently. Patients that started PPI previously, more often were prescribed with drugs for functional gastrointestinal disorders or acid related disorders, cardiac therapy, diuretics, beta blocking agents, and vasoprotective agents.

Table 3 shows the probability of receiving regular PPI prescriptions versus no PPI usage. This probability is significantly increased by different risk factors for GI side effects, by morbidity, medication, and increased age. LDASA users with a history of gastrointestinal complications were more likely to receive regular PPI prescriptions (adjusted OR 13.9; 95% CI: 11.8-16.4), as was found for the different medications used to define patients with an increased GI risk.

1  
2  
3 Simultaneous use of SSRIs (adjusted OR 9.1 (6.7-12.2)), NSAIDs (5.2 (4.3-6.3)),  
4  
5 glucocorticosteroids (6.1 (4.6-8.0)), and being 80 years and older (1.9 (1.5-2.3)) were strongly  
6  
7 related to receiving a PPI regularly. Sensitivity analyses for the group with an increased GI  
8  
9 risk did not alter our findings; similar predicting factors influenced the probability with equal  
10  
11 magnitude, except for age. Age was no longer a predicting factor (data not shown).  
12  
13

14  
15  
16 Applying the different sensitivity analyses did not alter our findings.  
17  
18  
19  
20  
21  
22  
23  
24  
25  
26  
27  
28  
29  
30  
31  
32  
33  
34  
35  
36  
37  
38  
39  
40  
41  
42  
43  
44  
45  
46  
47  
48  
49  
50  
51  
52  
53  
54  
55  
56  
57  
58  
59  
60

## Discussion

We showed that 36% of the regular LDASA user who have an increased GI risk did not receive prescriptions for PPIs by their primary care physician at all, and another 18% were irregular PPI users. So, both groups (54%) were not treated according to recent recommendations. Several factors increased the probability to obtain PPI prescription regularly; most important factors were previous GI complications, use of SSRIs, NSAIDs, glucocorticosteroids, or drugs for functional gastro-intestinal disorders, and increased age. The majority of LDASA users started with the PPI treatment before the initiation of LDASA treatment.

A large primary care population-based cohort-study of 50,126 NSAID users between 1996 and 2006 showed that physicians are not always aware of the need for gastroprotection when prescribing NSAID. Almost 60% of new NSAID users with at least one GI risk factor and 52% of patients with a history of GI bleeding/ulceration were not prescribed any gastroprotective agent. These numbers are almost in the same range as our results; however, this study made no distinction between specific types of NSAIDs<sup>17</sup>. A Spanish cross sectional, multi-centre study in which 3,357 patients from 713 primary care physicians participated, found that 82% of the NSAID and/or LDASA users with an increased GI risk received PPIs and 62% of the low GI risk patients<sup>20</sup>. So, the vast majority of all NSAID/LDASA users, even the patients with a low risk, received a PPI prescription, which is much higher than observed in our study. Yet, our study has a longitudinal design, and consequently has the information to label a patient as regular or irregular user of PPI. If we drop the strict condition of being a regular PPI user, to mimic a cross-sectional design, 64.5% of the patients with an increased risk obtained PPIs and 50.2% of the low risk patients. These numbers are more in line with the Spanish results, although still lower. Next to the number of

1  
2  
3 increased risk patients receiving PPIs, the timing of the initiation of PPI treatment is  
4  
5 important. Our study showed that the vast majority of patients started with PPI treatment  
6  
7 before or simultaneously with the first prescription of LDASA, thereby acting as preventive  
8  
9 agent.  
10

11  
12  
13  
14 In line with the HARM-WRESTLING recommendations, the US, NICE and ESC guidelines  
15  
16 also recommend to prescribe PPIs to LDASA users who are 60-70 years of age or older  
17  
18 and/or concomitantly use of SSRIs, NSAIDs, or glucocorticosteroids.<sup>12;13;15</sup> Therefore, we  
19  
20 believe our findings are not only relevant for the Netherlands, but have international  
21  
22 implications as well.  
23

24  
25  
26  
27 The study of Lanas *et al.* found that gastroprotective treatment in LDASA users was  
28  
29 significantly associated with a prior history of peptic ulcer, high dose NSAID therapy and  
30  
31 concomitant use of oral corticosteroids and antithrombotics<sup>20</sup>. Our data support these  
32  
33 findings. In several other population-based studies, having a history of GI complications,  
34  
35 including ulcers, is the strongest predictor for receiving a PPI, as is found in our study<sup>6;7;26</sup>.  
36  
37  
38

39  
40 Albeit the number of LDASA users with low GI risk that obtain PPIs is significantly lower  
41  
42 compared to the high risk population, over treatment with PPIs may occur in this group. In  
43  
44 total, 30% of patients with low GI risk received regularly PPI treatment. Although PPI  
45  
46 treatment is considered to be cheap, relatively safe, long-term treatment with this drug has  
47  
48 been shown to increase the susceptibility to GI infections and pneumonia, and it has been  
49  
50 associated with an increased risk of fractures<sup>27-29</sup>. Unfortunately, the reasons why these low  
51  
52 GI risk patients obtained (regular) PPI's by their primary care physician is very incompletely  
53  
54  
55  
56  
57  
58  
59  
60

1  
2  
3 recorded in our database, refraining us to comment on the necessity of these prescriptions in  
4  
5 patients with a low GI risk.  
6  
7

8  
9  
10 The only difference between patients who were at increased GI risk with or without regular  
11  
12 PPI therapy was the reason of being a patient with an increased GI risk; nearly 90% of the  
13  
14 patients who were at increased GI risk without regular PPI therapy were above 80 years,  
15  
16 whereas of the patients with regular PPI use, just 74% was above 80 years. Another possible  
17  
18 explanation why not all patients with an increased GI risk use PPIs regularly might be limited  
19  
20 awareness of primary care physicians of the current recommendation, since the draft version  
21  
22 was first published in 2008 and the final version in 2009, during the first months of our study  
23  
24 period.  
25  
26

27  
28  
29 A strong point of our study is that we had a large representative sample of patients monitored  
30  
31 in daily practice. The vast majority of the primary care centres in the Netherlands have a  
32  
33 computerised EMR, allowing us to use routinely recorded medical and prescription data from  
34  
35 primary care centres minimising the risk of recall bias. The participating primary care centres  
36  
37 are equally distributed throughout the Netherlands and we took possible differences between  
38  
39 practices into account by performing multilevel analyses. Another strength is that in our large  
40  
41 sample, we had complete data for each individual patient, including all physicians' diagnoses  
42  
43 and prescription data. This enabled us to study several different subpopulations of patients  
44  
45 combining LDASA and PPI treatment. Finally, we performed a range of sensitivity analyses  
46  
47 regarding exposure definition, and in- and exclusion criteria.  
48  
49  
50

51  
52  
53  
54 A limitation of this study includes the lack of information about prescriptions by medical  
55  
56 specialists. If PPIs were prescribed by medical specialists, the prescription of the patient  
57  
58  
59  
60



1  
2  
3 might not always appear in our dataset. Yet, the Dutch guidelines for optimising primary care-  
4  
5 medical specialist communication support medical specialists to inform primary care  
6  
7 physicians with the first results of diagnostics and treatments of the referred patient<sup>30,31</sup>. Due  
8  
9 to this, we may have underestimated regular PPI use. However, it is plausible that LDASA  
10  
11 prescription was initiated by the same medical specialist, so if PPI prescriptions are missing,  
12  
13 probably LDASA prescriptions are missing as well. In such a case the patient was not  
14  
15 included in our study, limiting the impact of missing PPI prescriptions. Our results are based  
16  
17 on an observational study which may be subjected to residual confounding due to potential  
18  
19 unmeasured differences in GI risk profile and patient characteristics between LDASA users  
20  
21 who received or did not received PPI prescriptions. Finally, we do not have any information  
22  
23 why patients with an increased GI risk did not obtain PPI prescriptions, nor do we know the  
24  
25 reason why patients become an irregular PPI user, and whether this was patient or physician  
26  
27 related.  
28  
29  
30  
31  
32  
33

34 In conclusion, primary care physicians do not fully adhere to the current recommendations to  
35  
36 prescribe PPIs regularly to LDASA users with an increased GI risk. Despite widespread  
37  
38 recommendations, more than half of the patients with an increased GI risk are not treated  
39  
40 sufficiently with a concomitant PPI, increasing the risk of gastrointestinal side effects. This  
41  
42 finding underlines the necessity to consider merging recommendations into one common,  
43  
44 standard and frequently used recommendation by primary care physicians. Further studies are  
45  
46 needed to determine which motivations and attitudes may play a role for primary care  
47  
48 physicians to be aware of the guidelines and be able to accept, and adhere to them.  
49  
50  
51  
52  
53  
54  
55  
56  
57  
58  
59  
60

**Contributors:**

HJIdJ contributed to the design of the study, performed data analyses and drafted the report.

JCK provided data, contributed to the design of the study and the interpretation of the results, and drafted and reviewed the report. LvD initiated and obtained the funding for the project, contributed to the design of the study and interpretation of the results, and drafted and reviewed the paper. EV and ECvD performed data analyses, contributed to the interpretation of the data, and reviewed the paper. MGHvO contributed to the design of the study and analysis plan, and interpretation of the results, and reviewed the paper.

**Conflicts of interest**

This study was funded by Astra Zeneca. The institute of JK and LvD received research funding from Astra Zeneca and Bristol-Myers Squibb for a study not related to this study. MGHvO has served as a consultant for AstraZeneca and Pfizer, and has received unrestricted research grants from AstraZeneca, Shire and Janssen.

**Funding:**

The sponsor of the study, AstraZeneca, had no decisive role in design and conduct of the study, collection, analysis, or interpretation of the data, or decision to submit the manuscript for publication.

JK and LvD had full access to all data in the study and take responsibility for the integrity of the data and accuracy of the data analysis. All authors had final responsibility for the decision to submit for publication

**Data sharing statement:** No additional data are available

**Ethics approval:** The privacy regulation of LINH was approved by the Dutch Data Protection Authority. According to Dutch legislation, neither obtaining informed consent nor approval by a medical ethics committee is obligatory for database studies

## Copyright

The Corresponding Author has the right to grant on behalf of all authors and does grant on behalf of all authors, a worldwide licence to the Publishers and its licensees in perpetuity, in all forms, formats and media (whether known now or created in the future), to i) publish, reproduce, distribute, display and store the Contribution, ii) translate the Contribution into other languages, create adaptations, reprints, include within collections and create summaries, extracts and/or, abstracts of the Contribution, iii) create any other derivative work(s) based on the Contribution, iv) to exploit all subsidiary rights in the Contribution, v) the inclusion of electronic links from the Contribution to third party material where-ever it may be located; and, vi) licence any third party to do any or all of the above.”

**Table 1. Characteristics of regular low-dose aspirin users with low risk of gastrointestinal complications and low-dose aspirin users with an increased risk of gastrointestinal complications, based upon HARM-wrestling recommendations**

|                                                                                                                                     | Patients with increased risk of GI complications<br>N = 3 213 | Patients with low risk of GI complications<br>N = 9 130 | p-value** |
|-------------------------------------------------------------------------------------------------------------------------------------|---------------------------------------------------------------|---------------------------------------------------------|-----------|
| <b>Risk factors for GI complications at first prescription of LDASA (%)<sup>*,†</sup></b>                                           |                                                               |                                                         |           |
| > 80 years old                                                                                                                      | 2 543 (79.1)                                                  | NA                                                      | NA        |
| > 70 years old and simultaneous use of NSAIDs, oral anticoagulants, glucocorticosteroids, SSRIs and/or spironolacton <sup>‡,§</sup> | 623 (19.4)                                                    | NA                                                      | NA        |
| > 60 years old and history of an ulcer                                                                                              | 47 (1.5)                                                      | NA                                                      | NA        |
| <b>Sex (%)</b>                                                                                                                      |                                                               |                                                         |           |
| Men                                                                                                                                 | 1 283 (39.9)                                                  | 5 352 (58.6)                                            | <0.0001   |
| <b>Age (yrs.) (SD)</b>                                                                                                              | 82.6 (6.1)                                                    | 62.1 (10.8)                                             | <0.0001   |
| <b>LDASA plus PPI use (%)<sup>  </sup></b>                                                                                          |                                                               |                                                         |           |
| No user of PPI                                                                                                                      | 1 142 (35.5)                                                  | 4 541 (49.8)                                            | <0.0001   |
| Regular user of PPI                                                                                                                 | 1 480 (46.1)                                                  | 2 724 (29.8)                                            |           |
| Irregular user of PPI                                                                                                               | 591 (18.4)                                                    | 1 865 (20.4)                                            |           |
| <b>Co-morbidity (%)<sup>†</sup></b>                                                                                                 |                                                               |                                                         |           |
| <b>Tractus digestives</b>                                                                                                           |                                                               |                                                         |           |
| Gastrointestinal complications                                                                                                      | 664 (20.7)                                                    | 1 475 (16.2)                                            | <0.0001   |
| Duodenal ulcer                                                                                                                      | 24 (0.8)                                                      | 21 (0.2)                                                | <0.0001   |
| Peptic ulcer                                                                                                                        | 34 (1.1)                                                      | 11 (0.1)                                                | <0.0001   |
| Hiatus Hernia                                                                                                                       | 29 (0.9)                                                      | 58 (0.6)                                                | 0.13      |
| Heart burn                                                                                                                          | 75 (2.3)                                                      | 233 (2.6)                                               | 0.52      |
| Haematemesis                                                                                                                        | 7 (0.2)                                                       | 10 (0.1)                                                | 0.19      |
| Rectal bleeding                                                                                                                     | 50 (1.6)                                                      | 97 (1.1)                                                | 0.04      |
| <b>Cardiovascular diseases</b>                                                                                                      |                                                               |                                                         |           |
| Cardiovascular diseases**                                                                                                           | 1 584 (49.3)                                                  | 4 196 (46.0)                                            | 0.002     |
| Acute myocardial infarction                                                                                                         | 223 (6.9)                                                     | 792 (8.7)                                               | 0.003     |
| Heart failure                                                                                                                       | 432 (13.5)                                                    | 257 (2.8)                                               | <0.0001   |
| Atrial fibrillation                                                                                                                 | 237 (7.4)                                                     | 509 (5.6)                                               | 0.0003    |
| Ischaemic heart disease w. angina                                                                                                   | 476 (14.8)                                                    | 1 328 (14.6)                                            | 0.72      |
| Ischaemic heart disease w/o angina                                                                                                  | 173 (5.4)                                                     | 638 (7.0)                                               | 0.003     |
| Atherosclerosis                                                                                                                     | 176 (5.5)                                                     | 644 (7.1)                                               | 0.003     |
| Cerebrovascular diseases**                                                                                                          | 756 (23.5)                                                    | 1 480 (16.2)                                            | <0.0001   |
| Stroke                                                                                                                              | 362 (11.3)                                                    | 731 (8.0)                                               | <0.0001   |
| Transient Ischaemic Attack (TIA)                                                                                                    | 326 (10.2)                                                    | 541 (5.9)                                               | <0.0001   |
| Hypertension                                                                                                                        | 1 307 (40.7)                                                  | 3 546 (38.8)                                            | 0.08      |
| Diabetes Mellitus                                                                                                                   | 779 (24.3)                                                    | 1 960 (21.5)                                            | 0.002     |
| Hypercholesteroleamia                                                                                                               | 1 567 (48.8)                                                  | 6 374 (69.8)                                            | <0.0001   |
| <b>Co-medication (%)<sup>†</sup></b>                                                                                                |                                                               |                                                         |           |
| Other drugs for acid related disorders                                                                                              | 196 (6.1)                                                     | 477 (5.2)                                               | 0.07      |
| Drugs for functional gastrointestinal disorders                                                                                     | 277 (8.6)                                                     | 544 (6.0)                                               | <0.0001   |
| Cardiac therapy                                                                                                                     | 964 (30.0)                                                    | 2 152 (23.6)                                            | <0.0001   |
| Antihypertensive agents                                                                                                             | 2 748 (85.5)                                                  | 7 357 (80.6)                                            | <0.0001   |
| Antihypertensives                                                                                                                   | 55 (1.7)                                                      | 171 (1.9)                                               | 0.58      |
| Diuretics                                                                                                                           | 1 594 (49.6)                                                  | 2 456 (26.9)                                            | <0.0001   |

|                           |              |              |         |
|---------------------------|--------------|--------------|---------|
| Beta blocking agents      | 1 728 (53·8) | 5 250 (57·5) | 0·0005  |
| Calcium channel blockers  | 825 (25·7)   | 2 113 (23·1) | 0·005   |
| RAAS agents <sup>††</sup> | 1 672 (52·0) | 4 616 (50·6) | 0·17    |
| Peripheral vasodilators   | 4 (0·1)      | 11 (0·1)     | 1·00    |
| Vasoprotectives           | 103 (3·2)    | 232 (2·5)    | 0·06    |
| Lipid modifying agents    | 1 557 (48·5) | 6 311 (69·1) | <0·0001 |
| Antidiabetics             | 624 (19·4)   | 1 604 (17·6) | 0·03    |

<sup>†</sup>GI: gastrointestinal

<sup>†</sup>LDASA: low-dose acetylsalicylic acid

<sup>\*</sup>NSAIDs: non-steroidal anti-inflammatory drugs

<sup>§</sup>SSRIs: selective serotonin reuptake inhibitors

<sup>||</sup>PPIs: proton pump inhibitors

<sup>¶</sup>Determined in the year before and after the first prescription of LDASA

<sup>\*\*</sup>not all indications are included, only the major ones

<sup>††</sup>RAAS: renin-angiotensin-aldosterone system

<sup>\*\*†</sup>p-values are corrected for multiple testing by using false discovery rate.

**Table 2. Characteristics of regular low-dose aspirin users and low-dose aspirin plus irregular and regular proton pump inhibitors users, stratified by time of proton pump inhibitor use**

|                                                 | Use of LDASA*<br>N = 5 683 | Irregular use of PPI†<br>N = 2 456 | Regular use of PPI<br>N = 4 204       |                                           |                                         | p-value** |
|-------------------------------------------------|----------------------------|------------------------------------|---------------------------------------|-------------------------------------------|-----------------------------------------|-----------|
|                                                 |                            |                                    | Previous starters of PPI<br>N = 2 015 | Simultaneous starters of PPI<br>N = 1 064 | Subsequent starters of PPI<br>N = 1 125 |           |
| <b>Age</b>                                      |                            |                                    |                                       |                                           |                                         |           |
| 18-50                                           | 599 (10.5)                 | 208 (8.5)                          | 176 (8.7)                             | 58 (5.4)                                  | 81 (7.2)                                | <0.0001   |
| 51-65                                           | 2 026 (35.7)               | 829 (33.8)                         | 592 (29.4)                            | 292 (27.4)                                | 331 (29.4)                              |           |
| 66-80                                           | 2 163 (38.1)               | 1 043 (42.5)                       | 801 (39.8)                            | 424 (39.9)                                | 494 (43.9)                              |           |
| 80+                                             | 895 (15.8)                 | 376 (15.3)                         | 446 (2.1)                             | 290 (27.3)                                | 219 (19.5)                              |           |
| <b>Sex</b>                                      |                            |                                    |                                       |                                           |                                         |           |
| Men                                             | 3 308 (58.2)               | 1 288 (52.4)                       | 912 (45.3)                            | 530 (49.8)                                | 597 (53.1)                              | <0.0001   |
| <b>Risk of GI complications (%)‡,  </b>         |                            |                                    |                                       |                                           |                                         |           |
| Increased risk of GI complications              | 1 142 (20.1)               | 591 (24.1)                         | 756 (37.5)                            | 414 (38.9)                                | 310 (27.6)                              | <0.0001   |
| Low risk of GI complications                    | 4 541 (79.9)               | 1 865 (75.9)                       | 1 259 (62.5)                          | 650 (61.1)                                | 815 (72.4)                              |           |
| <b>Co-morbidity (%)§</b>                        |                            |                                    |                                       |                                           |                                         |           |
| Gastrointestinal complications                  | 214 (3.8)                  | 594 (24.2)                         | 831 (41.2)                            | 217 (20.4)                                | 283 (25.2)                              | <0.0001   |
| Ulcers                                          | 6 (0.1)                    | 24 (1.0)                           | 38 (1.9)                              | 9 (0.9)                                   | 13 (1.2)                                | <0.0001   |
| Cardiovascular diseases                         | 2 447 (43.6)               | 1 190 (48.5)                       | 1 110 (55.1)                          | 456 (42.9)                                | 547 (48.6)                              | <0.0001   |
| Cerebrovascular diseases                        | 1 052 (18.5)               | 400 (16.3)                         | 406 (20.2)                            | 171 (16.1)                                | 207 (18.4)                              | 0.007     |
| Hypertension                                    | 2 221 (39.1)               | 989 (40.3)                         | 831 (41.2)                            | 335 (31.5)                                | 477 (42.4)                              | <0.0001   |
| Diabetes Mellitus                               | 1 189 (20.9)               | 544 (22.2)                         | 458 (22.7)                            | 292 (27.4)                                | 256 (22.8)                              | 0.0001    |
| Hypercholesterolaemia                           | 3 600 (63.4)               | 1 592 (64.8)                       | 1 302 (64.6)                          | 721 (67.8)                                | 726 (64.5)                              | 0.09      |
| <b>Co-medication (%)§</b>                       |                            |                                    |                                       |                                           |                                         |           |
| Other drugs for acid related disorders          | 227 (4.0)                  | 144 (5.9)                          | 163 (8.1)                             | 54 (5.1)                                  | 85 (7.6)                                | <0.0001   |
| Drugs for functional gastrointestinal disorders | 151 (2.7)                  | 211 (8.6)                          | 275 (13.7)                            | 83 (7.8)                                  | 101 (9.0)                               | <0.0001   |
| Cardiac therapy                                 | 1 142 (20.1)               | 664 (27.0)                         | 672 (33.4)                            | 324 (30.5)                                | 314 (27.9)                              | <0.0001   |
| Antihypertensive agents                         | 4 523 (79.6)               | 1 997 (81.3)                       | 1 721 (85.4)                          | 912 (85.7)                                | 952 (84.6)                              | <0.0001   |
| Antihypertensives                               | 102 (1.8)                  | 36 (1.5)                           | 44 (2.2)                              | 22 (2.1)                                  | 22 (2.0)                                | 0.48      |
| Diuretics                                       | 1 607 (28.3)               | 782 (31.8)                         | 826 (41.0)                            | 410 (38.5)                                | 425 (37.8)                              | <0.0001   |
| Beta blocking agents                            | 3 078 (54.2)               | 1 370 (55.8)                       | 1 255 (62.3)                          | 633 (59.5)                                | 642 (57.1)                              | <0.0001   |
| Calcium channel blockers                        | 1 078 (21.5)               | 571 (23.3)                         | 551 (27.3)                            | 286 (26.9)                                | 309 (27.5)                              | <0.0001   |
| RAAS agents¶                                    | 3 221 (49.3)               | 1 205 (49.6)                       | 1 081 (53.7)                          | 576 (54.1)                                | 624 (55.5)                              | <0.0001   |
| Vasoprotectives                                 | 111 (2.0)                  | 77 (3.1)                           | 84 (4.2)                              | 25 (2.4)                                  | 38 (3.4)                                | <0.0001   |
| Lipid modifying agents                          | 3 568 (62.8)               | 1 578 (64.3)                       | 1 288 (63.9)                          | 717 (67.4)                                | 717 (63.7)                              | 0.08      |
| Antidiabetics                                   | 974 (17.1)                 | 420 (17.1)                         | 378 (18.8)                            | 244 (22.9)                                | 212 (18.8)                              | 0.0001    |

\*LDASA: low-dose acetylsalicylic acid

†PPIs: proton pump inhibitors

‡Based upon HARM-WRESTLING recommendations: patients who are &gt; 80 years old, or &gt; 70 years old and simultaneous use of non-steroidal anti-inflammatory drugs (NSAIDs), oral anticoagulants, glucocorticosteroids, selective serotonin reuptake inhibitors (SSRIs) and/or spironolacton, or &gt; 60 years old and history of an ulcer.

§Determined in the year before and after the first prescription of LDASA

||GI: gastrointestinal

¶RAAS: renin-angiotensin-aldosterone system

\*\*p-values relate to the comparison of the five groups, and are corrected for multiple testing by using false discovery rate.

**Table 3. The probability of receiving a proton pump inhibitor regularly versus no PPI in patients treated regularly with low-dose aspirin**

|                                                               | LDASA users<br>(N = 9 887) <sup>†</sup>             |                                          |                       |
|---------------------------------------------------------------|-----------------------------------------------------|------------------------------------------|-----------------------|
|                                                               | Univariate<br>analysis<br>(OR; 95% CI) <sup>†</sup> | Multivariate<br>analysis<br>(OR; 95% CI) | p-value <sup>  </sup> |
| Age (ref = 18-50)                                             |                                                     |                                          |                       |
| 51-65                                                         | 1.28 (1.13 – 1.46)                                  | 1.09 (0.91 – 1.31)                       | 0.39                  |
| 66-80                                                         | 1.77 (1.56 – 2.00)                                  | 1.54 (1.28 – 1.84)                       | <0.0001               |
| 80+                                                           | 2.16 (1.88 – 2.48)                                  | 1.88 (1.54 – 2.30)                       | <0.0001               |
| Gender (ref = male)                                           | 1.48 (1.38 – 1.59)                                  | 1.26 (1.15 – 1.39)                       | <0.0001               |
| Increased risk of GI complications (ref = low) <sup>‡,§</sup> | 2.15 (1.99 – 2.33)                                  |                                          |                       |
| NSAIDs                                                        | 4.05 (3.72 – 4.41)                                  | 5.20 (4.31 – 6.28)                       | <0.0001               |
| Oral anticoagulants                                           | 1.48 (1.30 – 1.68)                                  | 1.46 (1.12 – 1.90)                       | 0.008                 |
| Glucocorticosteroids                                          | 4.39 (3.92 – 4.91)                                  | 6.06 (4.59 – 7.99)                       | <0.0001               |
| SSRIs                                                         | 5.88 (4.95 – 6.99)                                  | 9.07 (6.73 – 12.22)                      | <0.0001               |
| Spironolacton                                                 | 2.46 (2.04 – 2.96)                                  | 1.64 (1.22 – 2.22)                       | 0.002                 |
| Ulcer                                                         | 13.09 (6.75 – 25.40)                                |                                          |                       |
| Gastrointestinal complications                                | 14.88 (13.08 – 16.93)                               | 13.89 (11.78 – 16.37)                    | <0.0001               |
| Cardiovascular diseases                                       | 1.37 (1.27 – 1.47)                                  |                                          |                       |
| Cerebrovascular diseases                                      | 0.98 (0.89 – 1.07)                                  |                                          |                       |
| Hypertension                                                  | 1.13 (1.05 – 1.22)                                  | 0.83 (0.75 – 0.92)                       | 0.001                 |
| Diabetes Mellitus                                             | 1.21 (1.11 – 1.31)                                  |                                          |                       |
| Hypercholesterolemia                                          | 1.19 (1.11 – 1.28)                                  | 1.19 (1.07 – 1.32)                       | 0.003                 |
| Other drugs for acid related disorders                        | 1.84 (1.58 – 2.13)                                  |                                          |                       |
| Drugs for functional gastrointestinal disorders               | 4.62 (3.96 – 5.40)                                  | 2.40 (1.92 – 3.00)                       | <0.0001               |
| Cardiac therapy                                               | 1.85 (1.71 – 2.00)                                  | 1.55 (1.39 – 1.73)                       | <0.0001               |
| Antihypertensive agents                                       | 1.62 (1.48 – 1.77)                                  | 1.34 (1.17 – 1.55)                       | <0.0001               |
| Vasoprotectives                                               | 1.91 (1.55 – 2.33)                                  | 1.42 (1.06 – 1.91)                       | 0.03                  |
| Lipid modifying agents                                        | 1.18 (1.10 – 1.27)                                  |                                          |                       |
| Antidiabetics                                                 | 1.22 (1.11 – 1.33)                                  | 1.11 (0.98 – 1.26)                       | 0.1                   |

\*LDASA: low-dose acetylsalicylic acid

<sup>†</sup>OR: odds ratio, CI: confidence interval

<sup>‡</sup>GI: gastrointestinal

<sup>§</sup>Based upon HARM-WRESTLING recommendations: patients who are > 80 years old, or > 70 years old and simultaneous use of non-steroidal anti-inflammatory drugs (NSAIDs), oral anticoagulants, glucocorticosteroids, selective serotonin reuptake inhibitors (SSRIs) and/or spironolacton, or > 60 years old and history of an ulcer.

<sup>||</sup>p-values presented are for the multivariate analyses and are corrected for multiple testing by using false discovery rate.

1  
2  
3 **Figure 1. Study flow diagram**  
4  
5

6 LDASA, low-dose acetylsalicylic acid; GI, gastrointestinal; PPI, proton pump inhibitors; reg., regular; irreg.,  
7 irregular  
8  
9  
10  
11  
12  
13  
14  
15  
16

17 **Reference List**  
18

- 19 (1) World Health Organisation. Global atlas on cardiovascular disease prevention and  
20 control. 10-1-2012.  
21  
22  
23 (2) Antithrombotic Trialists' Collaboration. Collaborative meta-analysis of randomised  
24 trials of antiplatelet therapy for prevention of death, myocardial infarction, and stroke  
25 in high risk patients. *BMJ* 2002; 324(7329):71-86.  
26  
27 (3) Baigent C, Blackwell L, Collins R, Emberson J, Godwin J, Peto R et al. Aspirin in the  
28 primary and secondary prevention of vascular disease: collaborative meta-analysis of  
29 individual participant data from randomised trials. *Lancet* 2009; 373(9678):1849-  
30 1860.  
31  
32 (4) Chen ZM, Sandercock P, Pan HC, Counsell C, Collins R, Liu LS et al. Indications for  
33 early aspirin use in acute ischemic stroke : A combined analysis of 40 000 randomized  
34 patients from the chinese acute stroke trial and the international stroke trial. On behalf  
35 of the CAST and IST collaborative groups. *Stroke* 2000; 31(6):1240-1249.  
36  
37 (5) Wolff T, Miller T, Ko S. Aspirin for the primary prevention of cardiovascular events:  
38 an update of the evidence for the U.S. Preventive Services Task Force. *Ann Intern*  
39 *Med* 2009; 150(6):405-410.  
40  
41 (6) McQuaid KR, Laine L. Systematic review and meta-analysis of adverse events of low-  
42 dose aspirin and clopidogrel in randomized controlled trials. *Am J Med* 2006;  
43 119(8):624-638.  
44  
45 (7) Yeomans ND, Lanan AI, Talley NJ, Thomson AB, Daneshjoo R, Eriksson B et al.  
46 Prevalence and incidence of gastroduodenal ulcers during treatment with vascular  
47 protective doses of aspirin. *Aliment Pharmacol Ther* 2005; 22(9):795-801.  
48  
49 (8) Hsiao FY, Tsai YW, Huang WF, Wen YW, Chen PF, Chang PY et al. A comparison  
50 of aspirin and clopidogrel with or without proton pump inhibitors for the secondary  
51 prevention of cardiovascular events in patients at high risk for gastrointestinal  
52 bleeding. *Clin Ther* 2009; 31(9):2038-2047.  
53  
54  
55  
56  
57  
58  
59  
60



- 1  
2  
3 (9) Ng FH, Wong SY, Lam KF, Chu WM, Chan P, Ling YH et al. Famotidine is inferior  
4 to pantoprazole in preventing recurrence of aspirin-related peptic ulcers or erosions.  
5 *Gastroenterology* 2010; 138(1):82-88.  
6
- 7 (10) Scheiman JM, Devereaux PJ, Herlitz J, Katelaris PH, Lanas A, Veldhuyzen vZ et al.  
8 Prevention of peptic ulcers with esomeprazole in patients at risk of ulcer development  
9 treated with low-dose acetylsalicylic acid: a randomised, controlled trial (OBERON).  
10 *Heart* 2011; 97(10):797-802.  
11
- 12 (11) Yeomans ND. Reducing the risk of gastroduodenal ulcers with a fixed combination of  
13 esomeprazole and low-dose acetyl salicylic acid. *Expert Rev Gastroenterol Hepatol*  
14 2011; 5(4):447-455.  
15
- 16 (12) Bhatt DL, Scheiman J, Abraham NS, Antman EM, Chan FK, Furberg CD et al.  
17 ACCF/ACG/AHA 2008 expert consensus document on reducing the gastrointestinal  
18 risks of antiplatelet therapy and NSAID use: a report of the American College of  
19 Cardiology Foundation Task Force on Clinical Expert Consensus Documents.  
20 *Circulation* 2008; 118(18):1894-1909.  
21
- 22 (13) Hamm CW, Bassand JP, Agewall S, Bax J, Boersma E, Bueno H et al. ESC  
23 Guidelines for the management of acute coronary syndromes in patients presenting  
24 without persistent ST-segment elevation: The Task Force for the management of acute  
25 coronary syndromes (ACS) in patients presenting without persistent ST-segment  
26 elevation of the European Society of Cardiology (ESC). *Eur Heart J* 2011;  
27 32(23):2999-3054.  
28
- 29 (14) Ministerie van Volksgezondheid WeS. Een voorstel van de Expertgroep  
30 Medicatieveiligheid met betrekking tot concrete interventies die de extramurale  
31 medicatieveiligheid op korte termijn kunnen verbeteren. HARM-WRESTLING.  
32 2009. Den Haag, The Netherlands.  
33
- 34 (15) NICE. Acute upper gastrointestinal bleedings: management. NICE clinical guideline  
35 141. 2012.  
36
- 37 (16) Abraham NS, Hlatky MA, Antman EM, Bhatt DL, Bjorkman DJ, Clark CB et al.  
38 ACCF/ACG/AHA 2010 expert consensus document on the concomitant use of proton  
39 pump inhibitors and thienopyridines: a focused update of the ACCF/ACG/AHA 2008  
40 expert consensus document on reducing the gastrointestinal risks of antiplatelet  
41 therapy and NSAID use. A Report of the American College of Cardiology Foundation  
42 Task Force on Expert Consensus Documents. *J Am Coll Cardiol* 2010; 56(24):2051-  
43 2066.  
44
- 45 (17) Valkhoff VE, van Soest EM, Sturkenboom MC, Kuipers EJ. Time-trends in  
46 gastroprotection with nonsteroidal anti-inflammatory drugs (NSAIDs). *Aliment*  
47 *Pharmacol Ther* 2010; 31(11):1218-1228.  
48
- 49 (18) Hartnell NR, Flanagan PS, Mackinnon NJ, Bakowsky VS. Use of gastrointestinal  
50 preventive therapy among elderly persons receiving antiarthritic agents in Nova  
51 Scotia, Canada. *Am J Geriatr Pharmacother* 2004; 2(3):171-180.  
52  
53  
54  
55  
56  
57  
58  
59  
60

- 1  
2  
3 (19) Sturkenboom MC, Burke TA, Dieleman JP, Tangelder MJ, Lee F, Goldstein JL.  
4 Underutilization of preventive strategies in patients receiving NSAIDs. *Rheumatology*  
5 (*Oxford*) 2003; 42 Suppl 3:iii23-iii31.  
6  
7 (20) Lanas A, Plazas MA, Gimeno E, Munoz-Tuduri M. Gastroprotection in NSAID and  
8 low-dose aspirin users: a cross-sectional study in primary care. *Gastroenterol Hepatol*  
9 2012; 35(1):1-7.  
10  
11 (21) Bianco MA, Rotondano G, Buri L, Tessari F, Cipolletta L. Gastro-protective strategies  
12 in primary care in Italy: the "Gas.Pro." survey. *Dig Liver Dis* 2010; 42(5):359-364.  
13  
14 (22) Stirbu-Wagner I, Dorsman SA, Visscher S, Davids R, Gravenstein JV, Abrahamse H  
15 et al. Netherlands Information Network of General Practice (LINH). 2012. Utrecht /  
16 Nijmegen, NIVEL/IQ.  
17  
18  
19  
20 (23) Schellevis FG, Westert GP, De Bakker DH. [The actual role of general practice in the  
21 dutch health-care system. Results of the second dutch national survey of general  
22 practice]. *Med Klin (Munich)* 2005; 100(10):656-661.  
23  
24 (24) World Health Organisation. Guidelines for ATC classification and DDD assignment.  
25 Oslo: WHO Collaborating Centre for Drug Statistics Methodology - Nordic Council  
26 on Medicines; 1999.  
27  
28 (25) Lamberts H, Wood M. ICPC. International Classification of Primary Care. Oxford:  
29 Oxford University Press; 1987.  
30  
31 (26) Derry S, Loke YK. Risk of gastrointestinal haemorrhage with long term use of aspirin:  
32 meta-analysis. *BMJ* 2000; 321(7270):1183-1187.  
33  
34 (27) Leonard J, Marshall JK, Moayyedi P. Systematic review of the risk of enteric infection  
35 in patients taking acid suppression. *Am J Gastroenterol* 2007; 102(9):2047-2056.  
36  
37 (28) Laheij RJ, Sturkenboom MC, Hassing RJ, Dieleman J, Stricker BH, Jansen JB. Risk  
38 of community-acquired pneumonia and use of gastric acid-suppressive drugs. *JAMA*  
39 2004; 292(16):1955-1960.  
40  
41 (29) Yang YX, Lewis JD, Epstein S, Metz DC. Long-term proton pump inhibitor therapy  
42 and risk of hip fracture. *JAMA* 2006; 296(24):2947-2953.  
43  
44 (30) Richtlijn overdracht van medicatie gegevens in de keten. 2008. VWS and IGZ.  
45  
46 (31) Kvamme OJ, Olesen F, Samuelson M. Improving the interface between primary and  
47 secondary care: a statement from the European Working Party on Quality in Family  
48 Practice (EQuIP). *Qual Health Care* 2001; 10(1):33-39.  
49  
50  
51  
52  
53  
54  
55  
56  
57  
58  
59  
60

Figure 1. Study flow diagram

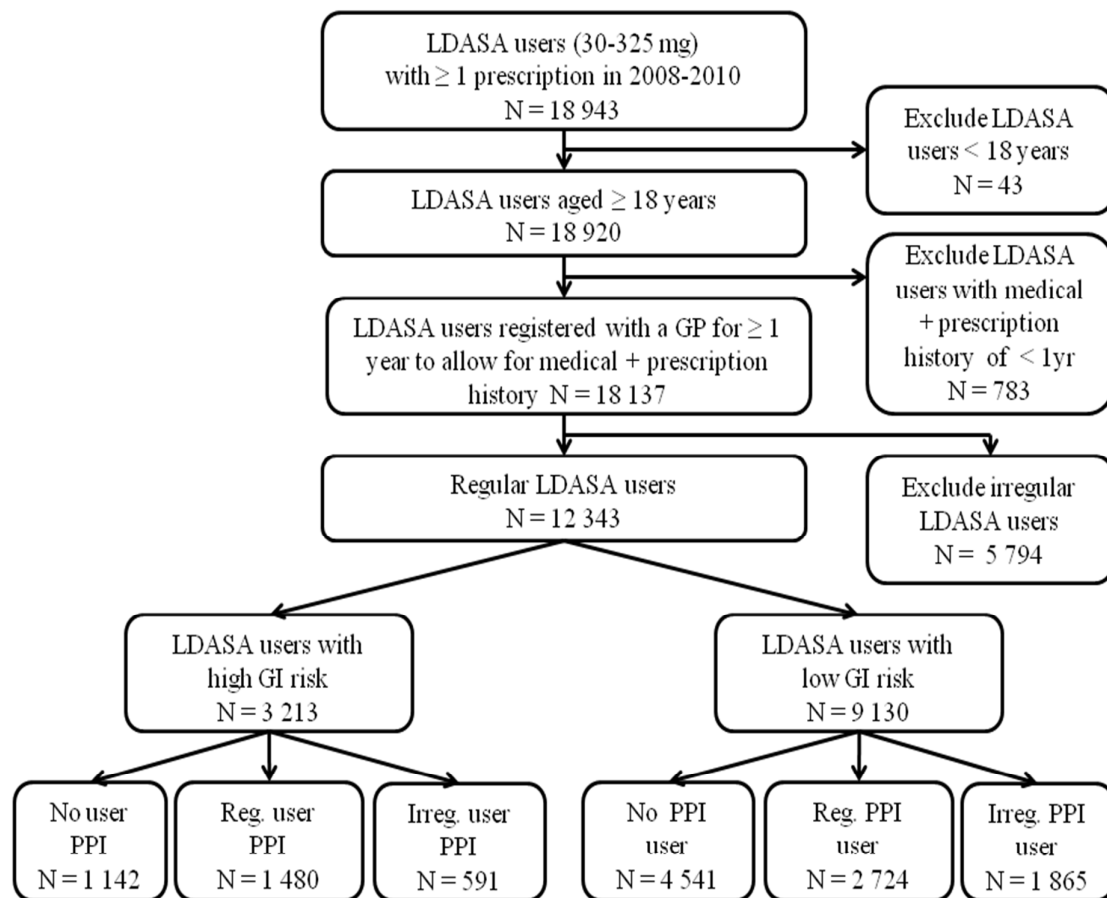

LDASA, low-dose acetylsalicylic acid; GI, gastrointestinal; PPI, proton pump inhibitors; reg., regular; irreg., irregular

**Appendix I. The definitions and ICPC- and ATC-codes for co-morbidity**

| Co-morbidity            | At least one medical record of diseases before and after the first prescription of LDASA (ICPC-codes)                                                                                                                                                                                                                                                                                                                                                                                                                                                                                           | At least one prescription of drugs before and after the first prescription of LDASA (ATC-codes) |
|-------------------------|-------------------------------------------------------------------------------------------------------------------------------------------------------------------------------------------------------------------------------------------------------------------------------------------------------------------------------------------------------------------------------------------------------------------------------------------------------------------------------------------------------------------------------------------------------------------------------------------------|-------------------------------------------------------------------------------------------------|
| Diabetes                | Diabetes (T90)                                                                                                                                                                                                                                                                                                                                                                                                                                                                                                                                                                                  | Insulin (A10A), Oral blood glucose lowering drugs (A10B)                                        |
| Hypertension            | Hypertension uncomplicated (K86), Hypertension complicated (K87)                                                                                                                                                                                                                                                                                                                                                                                                                                                                                                                                |                                                                                                 |
| Hyperlipidaemia         | Lipid disorder (T93)                                                                                                                                                                                                                                                                                                                                                                                                                                                                                                                                                                            | Lipid modifying agents (C10)                                                                    |
| GI complications        | Abdominal pain epigastric (D02), Heartburn (D03), Nausea (D09), Vomiting (D10), Haematemesis/ vomiting blood (D14), Rectal bleeding (D16), Duodenal ulcer (D85), Peptic ulcer other (D86), Stomach function disorder (D87), Hiatus hernia (D90)                                                                                                                                                                                                                                                                                                                                                 |                                                                                                 |
| Cardio-vascular Disease | Heart disease (K71), Congenital anomaly cardiovascular (K73), Ischaemic heart disease w. angina (K74), Acute myocardial infarction (K75), Ischaemic heart disease w/o angina (K76), Heart failure (K77), Atrial fibrillation/ flutter (K78), Paroxysmal tachycardia (K79), Cardiac arrhythmia (K80), Heart/ arterial murmur (K81), Pulmonary heart disease (K82), Heart valve disease (K83), Heart disease other (K84), Atherosclerosis (K92), Pulmonary embolism (K93), Phlebitis/ thrombophlebitis (K94), Varicose veins of leg (K95), Haemorrhoids (K96), Cardiovascular disease other (K99) |                                                                                                 |
| Cerebrovascular Disease | Transient cerebral ischaemia (K89), Stroke/cerebrovascular accident (K90), Cerebrovascular disease (K91)                                                                                                                                                                                                                                                                                                                                                                                                                                                                                        |                                                                                                 |

STROBE Statement—Checklist of items that should be included in reports of *cohort studies*

| Page                |                              | Item No | Recommendation                                                                                                                                                                                    |
|---------------------|------------------------------|---------|---------------------------------------------------------------------------------------------------------------------------------------------------------------------------------------------------|
| 1                   | <b>Title and abstract</b>    | 1       | (a) Indicate the study's design with a commonly used term in the title or the abstract                                                                                                            |
| 2+3                 |                              |         | (b) Provide in the abstract an informative and balanced summary of what was done and what was found                                                                                               |
| <b>Introduction</b> |                              |         |                                                                                                                                                                                                   |
| 5+6                 | Background/rationale         | 2       | Explain the scientific background and rationale for the investigation being reported                                                                                                              |
| 6                   | Objectives                   | 3       | State specific objectives, including any prespecified hypotheses                                                                                                                                  |
| <b>Methods</b>      |                              |         |                                                                                                                                                                                                   |
| 7                   | Study design                 | 4       | Present key elements of study design early in the paper                                                                                                                                           |
| 7                   | Setting                      | 5       | Describe the setting, locations, and relevant dates, including periods of recruitment, exposure, follow-up, and data collection                                                                   |
| 7                   | Participants                 | 6       | (a) Give the eligibility criteria, and the sources and methods of selection of participants. Describe methods of follow-up                                                                        |
| n.a.                |                              |         | (b) For matched studies, give matching criteria and number of exposed and unexposed                                                                                                               |
| 7-9                 | Variables                    | 7       | Clearly define all outcomes, exposures, predictors, potential confounders, and effect modifiers. Give diagnostic criteria, if applicable                                                          |
| 7-10                | Data sources/<br>measurement | 8*      | For each variable of interest, give sources of data and details of methods of assessment (measurement). Describe comparability of assessment methods if there is more than one group              |
| 10                  | Bias                         | 9       | Describe any efforts to address potential sources of bias                                                                                                                                         |
| 7                   | Study size                   | 10      | Explain how the study size was arrived at                                                                                                                                                         |
| 7-10                | Quantitative variables       | 11      | Explain how quantitative variables were handled in the analyses. If applicable, describe which groupings were chosen and why                                                                      |
| 9+10                | Statistical methods          | 12      | (a) Describe all statistical methods, including those used to control for confounding                                                                                                             |
| 10                  |                              |         | (b) Describe any methods used to examine subgroups and interactions                                                                                                                               |
| 10                  |                              |         | (c) Explain how missing data were addressed                                                                                                                                                       |
| n.a.                |                              |         | (d) If applicable, explain how loss to follow-up was addressed                                                                                                                                    |
| 10                  |                              |         | (e) Describe any sensitivity analyses                                                                                                                                                             |
| <b>Results</b>      |                              |         |                                                                                                                                                                                                   |
|                     | Participants                 | 13*     | (a) Report numbers of individuals at each stage of study—eg numbers potentially eligible, examined for eligibility, confirmed eligible, included in the study, completing follow-up, and analysed |
| 11                  |                              |         | (b) Give reasons for non-participation at each stage                                                                                                                                              |
| Fig 1               |                              |         | (c) Consider use of a flow diagram                                                                                                                                                                |
| Fig 1               |                              |         |                                                                                                                                                                                                   |
|                     | Descriptive data             | 14*     | (a) Give characteristics of study participants (eg demographic, clinical, social) and information on exposures and potential confounders                                                          |
| Table 1             |                              |         | (b) Indicate number of participants with missing data for each variable of interest                                                                                                               |
| n.a.                |                              |         | (c) Summarise follow-up time (eg, average and total amount)                                                                                                                                       |
| 7                   |                              |         |                                                                                                                                                                                                   |

|    |        |                          |     |                                                                         |
|----|--------|--------------------------|-----|-------------------------------------------------------------------------|
| 1  | Fig 1  | Outcome data             | 15* | Report numbers of outcome events or summary measures over time          |
| 2  | 11-12  | Main results             | 16  | (a) Give unadjusted estimates and, if applicable, confounder-           |
| 3  |        |                          |     | adjusted estimates and their precision (eg, 95% confidence interval).   |
| 4  |        |                          |     | Make clear which confounders were adjusted for and why they were        |
| 5  |        |                          |     | included                                                                |
| 6  |        |                          |     |                                                                         |
| 7  | Tables |                          |     | (b) Report category boundaries when continuous variables were           |
| 8  |        |                          |     | categorized                                                             |
| 9  |        |                          |     |                                                                         |
| 10 |        |                          |     | (c) If relevant, consider translating estimates of relative risk into   |
| 11 |        |                          |     | absolute risk for a meaningful time period                              |
| 12 | 12     | Other analyses           | 17  | Report other analyses done—eg analyses of subgroups and                 |
| 13 |        |                          |     | interactions, and sensitivity analyses                                  |
| 14 |        |                          |     |                                                                         |
| 15 |        | <b>Discussion</b>        |     |                                                                         |
| 16 | 13     | Key results              | 18  | Summarise key results with reference to study objectives                |
| 17 | 15-16  | Limitations              | 19  | Discuss limitations of the study, taking into account sources of        |
| 18 |        |                          |     | potential bias or imprecision. Discuss both direction and magnitude     |
| 19 |        |                          |     | of any potential bias                                                   |
| 20 |        |                          |     |                                                                         |
| 21 | 16     | Interpretation           | 20  | Give a cautious overall interpretation of results considering           |
| 22 |        |                          |     | objectives, limitations, multiplicity of analyses, results from similar |
| 23 |        |                          |     | studies, and other relevant evidence                                    |
| 24 |        |                          |     |                                                                         |
| 25 | 16     | Generalisability         | 21  | Discuss the generalisability (external validity) of the study results   |
| 26 |        |                          |     |                                                                         |
| 27 |        | <b>Other information</b> |     |                                                                         |
| 28 | 17     | Funding                  | 22  | Give the source of funding and the role of the funders for the present  |
| 29 |        |                          |     | study and, if applicable, for the original study on which the present   |
| 30 |        |                          |     | article is based                                                        |
| 31 |        |                          |     |                                                                         |

\*Give information separately for exposed and unexposed groups.

**Note:** An Explanation and Elaboration article discusses each checklist item and gives methodological background and published examples of transparent reporting. The STROBE checklist is best used in conjunction with this article (freely available on the Web sites of PLoS Medicine at <http://www.plosmedicine.org/>, Annals of Internal Medicine at <http://www.annals.org/>, and Epidemiology at <http://www.epidem.com/>). Information on the STROBE Initiative is available at <http://www.strobe-statement.org>.

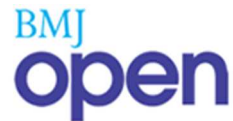

**Suboptimal prescribing of proton pump inhibitors in low-dose aspirin users; a cohort study in primary care.**

|                                 |                                                                                                                                                                                                                                                                                                |
|---------------------------------|------------------------------------------------------------------------------------------------------------------------------------------------------------------------------------------------------------------------------------------------------------------------------------------------|
| Journal:                        | <i>BMJ Open</i>                                                                                                                                                                                                                                                                                |
| Manuscript ID:                  | bmjopen-2013-003044.R1                                                                                                                                                                                                                                                                         |
| Article Type:                   | Research                                                                                                                                                                                                                                                                                       |
| Date Submitted by the Author:   | 11-Jun-2013                                                                                                                                                                                                                                                                                    |
| Complete List of Authors:       | de Jong, Hilda; NIVEL, Korevaar, J; Netherlands Institute for Health Services Research (NIVEL), van Dijk, Liset; NIVEL, Voogd, Eef; NIVEL, Dijk, Christel; Netherlands Institute of Health Services Research NIVEL van Oijen, Martijn; UCLA, Center for Outcomes Research and Education (CORE) |
| <b>Primary Subject Heading</b>: | General practice / Family practice                                                                                                                                                                                                                                                             |
| Secondary Subject Heading:      | Gastroenterology and hepatology                                                                                                                                                                                                                                                                |
| Keywords:                       | PRIMARY CARE, GASTROENTEROLOGY, PREVENTIVE MEDICINE, Cardiology < INTERNAL MEDICINE                                                                                                                                                                                                            |
|                                 |                                                                                                                                                                                                                                                                                                |

SCHOLARONE™  
Manuscripts

Peer review only

1  
2  
3 **Suboptimal prescribing of proton pump inhibitors in low-dose aspirin users; a cohort**  
4 **study in primary care.**  
5  
6

7 Hilda JI De Jong, Joke C Korevaar, Liset Van Dijk, Eef Voogd, Christel E Van Dijk, Martijn  
8

9 GH Van Oijen  
10

11  
12  
13  
14 **Affiliates**

15  
16 NIVEL, Netherlands Institute for Health Services Research, Utrecht, The Netherlands, Hilda  
17  
18 de Jong PhD-student, Joke Korevaar Research Coordinator General Practice Care, Liset van  
19  
20 Dijk Research Coordinator Pharmaceutical Care, Eef Voogd PhD-student, Christel van Dijk  
21  
22 Senior researcher.  
23

24  
25 Division of Digestive Diseases, David Geffen School of Medicine, UCLA, Los Angeles,  
26  
27 California, USA and UCLA/VA Center for Outcomes Research and Education (CORE), Los  
28  
29 Angeles, California, USA, Martijn van Oijen assistant professor.  
30  
31

32  
33  
34 **Corresponding author**

35 JC Korevaar  
36 P.O. Box 1568  
37 3500 BN Utrecht  
38 The Netherlands  
39 +31 30 27 29 711  
40 j.korevaar@nivel.nl  
41  
42

43  
44 **Keywords:** low-dose aspirin, proton pump inhibitors, GI complications, primary care  
45

46 **Wordcount:** 3089  
47

48 **Funding:** AstraZeneca; NIVEL  
49

50 **Short title:** suboptimal prescribing of PPIs in LDASA users in primary care  
51  
52  
53  
54  
55  
56  
57  
58  
59  
60



**Abstract****Objective**

Determine the adherence to recommendations of concomitant PPI treatment in regular LDASA users, taking factors associated with the probability of receiving a PPI into account.

**Design**

Cohort study

**Setting**

Data were obtained from 120 Dutch primary care centres participating in the Netherlands Information Network of Primary Care (LINH).

**Participants**

Patients 18 years and older who were regularly prescribed LDASA (30-325 mg) in 2008-2010 were included.

**Main outcome measures**

Regular medication use was defined as receiving each consecutive prescription within 6 months after the previous one. Based upon national guidelines, we categorised LDASA users into low and high GI risk. A multilevel multivariable logistic regression analysis was applied to identify patient characteristics that influenced on the probability of regular PPI prescriptions.

## Results

We identified 12,343 patients who started LDASA treatment, of whom 3,213 (26%) were at increased risk of GI complications. In this group, concomitant regular use of PPI was 46%, 36% did not receive PPI prescriptions and 18% obtained prescriptions irregularly ( $p < 0.0001$ ). The chance to obtain regularly PPI prescriptions versus no PPI was significantly influenced by, among others, previous GI complications (OR 13.9 [95%CI: 11.8 – 16.4]), use of NSAIDs (OR: 5.2 [4.3-6.3]), glucocorticosteroids (6.1 [4.6-8.0]), SSRIs (9.1 [6.7-12.2]), drugs for functional GI disorders (2.4 [1.9-3.0]) and increased age.

## Conclusion

Primary care physicians do not fully adhere to the current recommendations to prescribe PPIs regularly to LDASA users with an increased GI risk. More than 50% of the patients with an increased GI risk are not treated sufficiently with a concomitant PPI, increasing the risk of gastrointestinal side effects. This finding underlines the necessity to consider merging recommendations into one common, standard and frequently used recommendation by primary care physicians.

## Article Summary

### *Article focus*

- LDASA use is associated with a wide variety of gastrointestinal (GI) side effects.
- Concomitant use of PPIs for patients who are at increased risk for GI complications is advised
- Adherence and persistence of PPI use in primary care of patients using LDASA frequently is still indefinite

### *Key messages*

- Primary care physicians do not fully adhere to the current recommendations to prescribe PPIs regularly to LDASA users with an increased GI risk
- Concomitant regular use of PPI with LDASA in patients with an increased GI risk was 46% in primary care
- 36% of the LDASA users with an increased GI risk and treated in primary care, obtained no PPI prescriptions, and 18% obtained prescriptions irregular

### *Strengths and limitations of this study*

- Large representative sample of patients monitored in daily practice in primary care
- No information available why patients with an increased GI risk did not obtain PPI prescriptions, or why they became an irregular PPI user

## Introduction

Worldwide, the number of deaths from cardiovascular disease was estimated at 17.3 million in 2008, and it is expected to increase to approximately 23.6 million by 2030<sup>1</sup>. Treatment with low-dose of aspirin (LDASA) is recommended for the prevention of cardiovascular events in patients with a history of myocardial infarction, stroke, transient ischaemic attack or (in)stable angina<sup>2-4</sup>. While LDASA use is associated with a decreased risk of cardiovascular events<sup>5</sup>, its use is also associated with a wide variety of gastrointestinal (GI) side effects, such as dyspepsia, peptic ulcers, and upper and lower GI bleedings<sup>6;7</sup>.

GI complications associated with LDASA use are more frequently present in patients who are older than 70 years, have a history of peptic ulcer, have had an infection with *Helicobacter pylori*, and/or used concomitant drug therapies with non-steroidal anti-inflammatory drugs (NSAIDs), including cyclooxygenase-2 (COX-2) inhibitors, other antiplatelet agents or anticoagulants, glucocorticosteroids, and/or selective serotonin reuptake inhibitors (SSRIs)<sup>6;7</sup>. Concomitant proton pump inhibitor (PPI) therapy is associated with a reduction of the risk of GI complications<sup>8-11</sup>.

Therefore, concomitant use of PPIs for patients who use regular LDASA and are at increased risk for GI complications has been described in guidelines from medical societies and scientific associations from both the USA and Europe<sup>12;13</sup>. In the Netherlands - the setting of our study - an expert group with a focus on optimising extramural medication safety published specific recommendations for adequate gastrointestinal protection, i.e. prescribing PPIs in regular LDASA users with an increased risk of GI complications in 2008, which was finalised in 2009<sup>14</sup>. These recommendations are in line with the US, NICE and ESC guidelines<sup>12;13;15</sup>, and describe that PPIs are the preferred agents for the therapy and

1  
2  
3 prophylaxis of aspirin-associated GI injury<sup>12</sup>. Risk reduction due to PPI treatment observed in  
4  
5 case-control and cohort studies ranged in most cases from 40 to 80%.<sup>16</sup>  
6  
7

8  
9  
10 Several observational studies described the use of concomitant PPI in a patients receiving  
11  
12 NSAID including aspirin, and showed that 67-90% of the users with at least one risk factor  
13  
14 did not receive gastroprotective therapy as recommended<sup>17 18;19</sup>. Two studies focussed on  
15  
16 LDASA patients; in one study the definition of increased GI risk was limited, namely a  
17  
18 positive *Helicobacter pylori* status, the other study had a small sample size of LDASA  
19  
20 patients.<sup>20;21</sup>. Although evidence regarding the adherence to concomitant PPI use in patients  
21  
22 with an increased risk for GI complications is increasing, the adherence and persistence of PPI  
23  
24 use is still indefinite.  
25  
26

27  
28  
29 The objective of this study is to determine the adherence to recommendations of concomitant  
30  
31 PPI treatment in regular LDASA users, taking factors associated with the probability of  
32  
33 receiving a PPI into account.  
34  
35  
36  
37  
38  
39  
40  
41  
42  
43  
44  
45  
46  
47  
48  
49  
50  
51  
52  
53  
54  
55  
56  
57  
58  
59  
60

## Methods

Data were obtained from the Netherlands Information Network of Primary Care Physicians (LINH), a database derived from primary care centres that record data on morbidity, and drug prescriptions on continuous basis in electronic medical records (EMR). The LINH network consists of a dynamic cohort of 700,000 patients who are registered at 120 centres<sup>22</sup>. The network is a representative sample of the Dutch population, it started in 2001 and registration is still on-going.<sup>22</sup> In the Netherlands, all citizens are registered with a primary care physician who act as a gatekeeper for access to specialised care<sup>23</sup>.

Prescription data were classified according to the Anatomical Therapeutic and Chemical (ATC) classification<sup>24</sup>, and morbidity was coded by using the International Classification of Primary Care (ICPC) scheme<sup>25</sup>. The privacy regulation of LINH was approved by the Dutch Data Protection Authority. According to Dutch legislation, neither obtaining informed consent nor approval by a medical ethics committee is obligatory for database studies.

In this longitudinal, observational study, all patients aged 18 years and older who started with regular use of LDASA (30-325 mg) treatment between January 1, 2008, and December 31, 2010 were included under the condition that their history was available at least one year before the date of the first prescription of LDASA. This time period was chosen to confirm that no LDASA prescriptions were given in the year prior to inclusion. Regular use of LDASA was defined as receiving each consecutive prescription within six months after the previous one. A gap of maximal six months was chosen because in daily practice patients rarely collect a subsequent prescription exactly on the day their supply of their previous prescription has ended, normally 90 days, but rather earlier (overlap of two prescriptions) or later (gap between two prescriptions). In order not to bias our results towards irregular user

1  
2  
3 categorisation, we used a maximum period of six months. Irregular LDASA users, according  
4  
5 to our definition, were excluded from the analyses as well as users with just one LDASA  
6  
7 prescription. Aspirin therapy was identified by a prescription of acetylsalicylic acid (ATC-  
8  
9 codes B01AC06, N02BA01 and N02BA51), carbasalate calcium (B01AC08, N02BA15 and  
10  
11 N02BA65), or acetylsalicylic acid in combination with other drugs (B01AC30).

12  
13  
14  
15  
16 Based upon the HARM-WRESTLING recommendations<sup>14</sup>, we categorised new LDASA  
17  
18 users into low or increased risk of GI complications. Patients with an increased risk of GI  
19  
20 complications were identified by the following selection rules applied in consecutive order: 1)  
21  
22 80 years or older; 2) 70 years or older with simultaneous use of NSAIDs, oral anticoagulants,  
23  
24 platelet aggregation inhibitors, glucocorticosteroids, SSRIs and/or spironolacton; or 3) 60  
25  
26 years or older with a history of a peptic ulcer.  
27  
28

29  
30  
31 PPI treatment was identified by ATC-code A02BC. All patients were divided into three  
32  
33 categories: *no user*, *irregular*, or *regular* user of PPIs. Patients who never received a  
34  
35 prescription of PPI during the follow-up period were defined as *no PPI users*. In line with our  
36  
37 definition of a regular LDASA user, patients were defined as *regular PPI users* if they  
38  
39 received each consecutive prescription within 6 months after their previous one. All others  
40  
41 were considered as *irregular users*.  
42  
43  
44

45  
46  
47 We considered patients to be *previous starters of PPIs* when they received a prescription of  
48  
49 PPI in the year prior to the first prescription of LDASA. Patients who started the use of PPIs  
50  
51 within a week after the first prescription of LDASA were considered as *simultaneous starters*  
52  
53 *of PPIs*. Patients who received a prescription of PPI more than a week after the first  
54  
55 prescription of LDASA were *subsequent starters of PPIs*.  
56  
57  
58  
59  
60

1  
2  
3  
4  
5 Relevant co-morbidity was determined in the year before and after the date of the first  
6  
7 prescription of LDASA. Cardiovascular and cerebrovascular diseases were identified by  
8  
9 ICPC-codes K71, K73-K84, K89-K96 and K99. Hypertension was considered present when  
10  
11 the patient had a medical record of ICPC-codes K86 or K87. Patients were classified as  
12  
13 diabetic if a diagnosis code for diabetes (T90) was identified, or when they received anti-  
14  
15 diabetic therapy (ATC-codes A10A and A10B). Patients who had a diagnosis of lipid disorder  
16  
17 (T93) or when they received lipid modifying agents (C10) were considered as  
18  
19 hypercholesterolaemic. GI complications, including peptic ulcers, were identified by D02,  
20  
21 D03, D09, D10, D14, D16, D85-87, and D90 (Appendix I). To classify patients as having an  
22  
23 increased GI risk based on HARM-WRESTLING recommendation, we determined  
24  
25 prescriptions for NSAIDs (M01), including Cox-2 inhibitors, oral anticoagulants and platelet  
26  
27 aggregation inhibitors (B01AA and B01AC), glucocorticosteroids (H02AB and H02), and  
28  
29 SSRIs (N06AB) [16]. In addition, we identified all prescriptions for cardiovascular system  
30  
31 (C01-C10), acid related disorders (A02 (PPIs excluded)), and functional gastro-intestinal  
32  
33 disorders (A03) in the year before and after the date of the first LDASA prescription. Finally,  
34  
35 cardiac therapy was defined as a prescription of an ATC-code C01 in the year before or after  
36  
37 the first LDASA prescription.  
38  
39  
40  
41  
42  
43  
44

#### 45 *Statistical analysis*

46  
47 Differences between groups were tested with a Chi-square test. To identify the relative  
48  
49 influence of patient characteristics on the probability to obtain regular PPI prescriptions,  
50  
51 multilevel multivariable logistic regression analyses (backward elimination method) was  
52  
53 conducted. The models were estimated taking the clustering of patients (level 1) within  
54  
55 primary care centres (level 2) into account. The probability of receiving a PPI was determined  
56  
57  
58  
59  
60



1  
2  
3 by comparing no PPI users with regular PPI users. This analyses was performed without the  
4  
5 irregular users to rule out the effect of these users. In addition, separate analyses were  
6  
7 performed for increased GI risk patients. All data were analysed using the statistical programs  
8  
9 SAS version 9.2 (SAS Institute, Cary, North Carolina) and ‘Multilevel models for windows’  
10  
11 (MLwin 2.02). Adjustment for multiple testing was performed by using a False Discovery  
12  
13 Rate correction.  
14

15  
16  
17  
18 Choices of our definition of subsequent and simultaneous start of PPIs, and our period of  
19  
20 describing patients’ characteristics were based on assumptions, and therefore we tested the  
21  
22 robustness of our findings by performing sensitivity analyses. We made the definition of  
23  
24 simultaneous starters of PPIs more strictly, i.e. receiving a prescription of PPIs at exactly the  
25  
26 same date as the first prescription of LDASA. Secondly, we changed the medical and  
27  
28 prescription history into only one year before the date of the first LDASA prescription.  
29  
30 Thirdly, as LDASA therapy was frequently prescribed for patients with cardiovascular  
31  
32 diseases, a separate analysis with solely cardiovascular patients was conducted. Finally, we  
33  
34 investigated the influence of irregular users of PPIs into our analysis by performing two  
35  
36 analyses in which we (1) merged irregular users with regular users of PPIs and in which we  
37  
38 (2) added irregular users to the no PPI users group.  
39  
40  
41  
42  
43  
44

#### 45 *Role of the funding source*

46  
47 The sponsor had no decisive role in the study, i.e. the sponsor thought along with the study  
48  
49 and supplied suggestions regarding the content of the study, but the sponsor was not involved  
50  
51 in the decisions regarding the analysis, the conduct of the study, nor the publication. JK and  
52  
53 LvD had full access to all data in the study and take responsibility for the integrity of the data  
54  
55  
56  
57  
58  
59  
60

1  
2  
3  
4  
5  
6  
7  
8  
9  
10  
11  
12  
13  
14  
15  
16  
17  
18  
19  
20  
21  
22  
23  
24  
25  
26  
27  
28  
29  
30  
31  
32  
33  
34  
35  
36  
37  
38  
39  
40  
41  
42  
43  
44  
45  
46  
47  
48  
49  
50  
51  
52  
53  
54  
55  
56  
57  
58  
59  
60

and accuracy of the data analysis. All authors had final responsibility for the decision to submit for publication.

For peer review only

## Results

In the study population, 18,137 new LDASA users of 18 years and older were identified of whom 12,343 were regular users during the years 2008-2010 (Figure 1). Of these incident regular LDASA users, 3,213 (26.0%) were at increased risk for GI complications. The vast majority was at an increased GI risk due to their age. In total, 64.5% of the patients who were at increased GI risk obtained a PPI prescription; 46.1% was a regular and 18.4% an irregular user. In the group of patients with an increased GI risk without PPI prescription, the main reason for having an increased GI risk was age, above 80 years (n=994, 87%). Cardiovascular diseases are reported in almost half of the patients, and are significantly more prevalent among patients with increased GI risk (49.3% vs. 46.0%, p=0.002). The use of co-medication is generally higher in the increased GI risk group, with the exception of lipid modifying agents (Table 1).

In total, 4,204 (34.1%) patients were regular PPI users, 2,456 (19.9%) were irregular users, and 5,683 (46.0%) used no PPI (Table 2). Of the regular PPI users nearly half of the patients (48%) started PPI therapy previously, 25% started PPI therapy simultaneously, and 27% started subsequently. Patients that started PPI previously, more often were prescribed with drugs for functional gastrointestinal disorders or acid related disorders, cardiac therapy, diuretics, beta blocking agents, and vasoprotective agents.

Table 3 shows the probability of receiving regular PPI prescriptions versus no PPI usage. This probability is significantly increased by different risk factors for GI side effects, by morbidity, medication, and increased age. LDASA users with a history of gastrointestinal complications were more likely to receive regular PPI prescriptions (adjusted OR 13.9; 95% CI: 11.8-16.4), as was found for the different medications used to define patients with an increased GI risk.

1  
2  
3 Simultaneous use of SSRIs (adjusted OR 9.1 (6.7-12.2)), NSAIDs (5.2 (4.3-6.3)),  
4  
5 glucocorticosteroids (6.1 (4.6-8.0)), and being 80 years and older (1.9 (1.5-2.3)) were strongly  
6  
7 related to receiving a PPI regularly. Sensitivity analyses for the group with an increased GI  
8  
9 risk did not alter our findings; similar predicting factors influenced the probability with equal  
10  
11 magnitude, except for age. Age was no longer a predicting factor (data not shown).  
12  
13

14  
15  
16 Applying the different sensitivity analyses did not alter our findings.  
17  
18  
19  
20  
21  
22  
23  
24  
25  
26  
27  
28  
29  
30  
31  
32  
33  
34  
35  
36  
37  
38  
39  
40  
41  
42  
43  
44  
45  
46  
47  
48  
49  
50  
51  
52  
53  
54  
55  
56  
57  
58  
59  
60

## Discussion

We showed that 36% of the regular LDASA user who have an increased GI risk did not receive prescriptions for PPIs by their primary care physician at all, and another 18% were irregular PPI users. So, both groups (54%) were not treated according to recent recommendations. Several factors increased the probability to obtain PPI prescription regularly; most important factors were previous GI complications, use of SSRIs, NSAIDs, glucocorticosteroids, or drugs for functional gastro-intestinal disorders, and increased age. The majority of LDASA users started with the PPI treatment before the initiation of LDASA treatment.

A large primary care population-based cohort-study of 50,126 NSAID users between 1996 and 2006 showed that physicians are not always aware of the need for gastroprotection when prescribing NSAID. Almost 60% of new NSAID users with at least one GI risk factor and 52% of patients with a history of GI bleeding/ulceration were not prescribed any gastroprotective agent. These numbers are almost in the same range as our results; however, this study made no distinction between specific types of NSAIDs<sup>17</sup>. A Spanish cross sectional, multi-centre study in which 3,357 patients from 713 primary care physicians participated, found that 82% of the NSAID and/or LDASA users with an increased GI risk received PPIs and 62% of the low GI risk patients<sup>20</sup>. So, the vast majority of all NSAID/LDASA users, even the patients with a low risk, received a PPI prescription, which is much higher than observed in our study. Yet, our study has a longitudinal design, and consequently has the information to label a patient as regular or irregular user of PPI. If we drop the strict condition of being a regular PPI user, to mimic a cross-sectional design, 64.5% of the patients with an increased risk obtained PPIs and 50.2% of the low risk patients. These numbers are more in line with the Spanish results, although still lower. Next to the number of

1  
2  
3 increased risk patients receiving PPIs, the timing of the initiation of PPI treatment is  
4 important. Our study showed that the vast majority of patients started with PPI treatment  
5 before or simultaneously with the first prescription of LDASA, thereby acting as preventive  
6 agent.  
7  
8  
9  
10

11  
12  
13  
14 In line with the HARM-WRESTLING recommendations, the US, NICE and ESC guidelines  
15 also recommend to prescribe PPIs to LDASA users who are 60-70 years of age or older  
16 and/or concomitantly use of SSRIs, NSAIDs, or glucocorticosteroids.<sup>12;13;15</sup> Therefore, we  
17 believe our findings are not only relevant for the Netherlands, but have international  
18 implications as well.  
19  
20  
21  
22  
23  
24

25  
26  
27 The study of Lanas *et al.* found that gastroprotective treatment in LDASA users was  
28 significantly associated with a prior history of peptic ulcer, high dose NSAID therapy and  
29 concomitant use of oral corticosteroids and antithrombotics<sup>20</sup>. Our data support these  
30 findings. In several other population-based studies, having a history of GI complications,  
31 including ulcers, is the strongest predictor for receiving a PPI, as is found in our study<sup>6;7;26</sup>.  
32  
33  
34  
35  
36  
37  
38  
39

40 Albeit the number of LDASA users with low GI risk that obtain PPIs is significantly lower  
41 compared to the high risk population, over treatment with PPIs may occur in this group. In  
42 total, 30% of patients with low GI risk received regularly PPI treatment. Although PPI  
43 treatment is considered to be cheap, relatively safe, long-term treatment with this drug has  
44 been shown to increase the susceptibility to GI infections and pneumonia, and it has been  
45 associated with an increased risk of fractures<sup>27-29</sup>. Unfortunately, the reasons why these low  
46 GI risk patients obtained (regular) PPI's by their primary care physician is very incompletely  
47  
48  
49  
50  
51  
52  
53  
54  
55  
56  
57  
58  
59  
60

1  
2  
3 recorded in our database, refraining us to comment on the necessity of these prescriptions in  
4  
5 patients with a low GI risk.  
6  
7

8  
9  
10 The only difference between patients who were at increased GI risk with or without regular  
11  
12 PPI therapy was the reason of being a patient with an increased GI risk; nearly 90% of the  
13  
14 patients who were at increased GI risk without regular PPI therapy were above 80 years,  
15  
16 whereas of the patients with regular PPI use, just 74% was above 80 years. Another possible  
17  
18 explanation why not all patients with an increased GI risk use PPIs regularly might be limited  
19  
20 awareness of primary care physicians of the current recommendation, since the draft version  
21  
22 was first published in 2008 and the final version in 2009, during the first months of our study  
23  
24 period.  
25  
26

27  
28  
29 A strong point of our study is that we had a large representative sample of patients monitored  
30  
31 in daily practice. The vast majority of the primary care centres in the Netherlands have a  
32  
33 computerised EMR, allowing us to use routinely recorded medical and prescription data from  
34  
35 primary care centres minimising the risk of recall bias. The participating primary care centres  
36  
37 are equally distributed throughout the Netherlands and we took possible differences between  
38  
39 practices into account by performing multilevel analyses. Another strength is that in our large  
40  
41 sample, we had complete data for each individual patient, including all physicians' diagnoses  
42  
43 and prescription data. This enabled us to study several different subpopulations of patients  
44  
45 combining LDASA and PPI treatment. Finally, we performed a range of sensitivity analyses  
46  
47 regarding exposure definition, and in- and exclusion criteria.  
48  
49  
50

51  
52  
53 A limitation of this study includes the lack of information about prescriptions by medical  
54  
55 specialists. If PPIs were prescribed by medical specialists, the prescription of the patient  
56  
57  
58  
59  
60

1  
2  
3 might not always appear in our dataset. Yet, the Dutch guidelines for optimising primary care-  
4  
5 medical specialist communication support medical specialists to inform primary care  
6  
7 physicians with the first results of diagnostics and treatments of the referred patient<sup>30,31</sup>. Due  
8  
9 to this, we may have underestimated regular PPI use. However, it is plausible that LDASA  
10  
11 prescription was initiated by the same medical specialist, so if PPI prescriptions are missing,  
12  
13 probably LDASA prescriptions are missing as well. In such a case the patient was not  
14  
15 included in our study, limiting the impact of missing PPI prescriptions. Our results are based  
16  
17 on an observational study which may be subjected to residual confounding due to potential  
18  
19 unmeasured differences in GI risk profile and patient characteristics between LDASA users  
20  
21 who received or did not received PPI prescriptions. Finally, we do not have any information  
22  
23 why patients with an increased GI risk did not obtain PPI prescriptions, nor do we know the  
24  
25 reason why patients become an irregular PPI user, and whether this was patient or physician  
26  
27 related.  
28  
29  
30  
31  
32  
33

34 In conclusion, primary care physicians do not fully adhere to the current recommendations to  
35  
36 prescribe PPIs regularly to LDASA users with an increased GI risk. Despite widespread  
37  
38 recommendations, more than half of the patients with an increased GI risk are not treated  
39  
40 sufficiently with a concomitant PPI, increasing the risk of gastrointestinal side effects. This  
41  
42 finding underlines the necessity to consider merging recommendations into one common,  
43  
44 standard and frequently used recommendation by primary care physicians. Further studies are  
45  
46 needed to determine which motivations and attitudes may play a role for primary care  
47  
48 physicians to be aware of the guidelines and be able to accept, and adhere to them.  
49  
50  
51  
52  
53  
54  
55  
56  
57  
58  
59  
60



**Contributors:**

HJIdJ contributed to the design of the study, performed data analyses and drafted the report.

JCK provided data, contributed to the design of the study and the interpretation of the results, and drafted and reviewed the report. LvD initiated and obtained the funding for the project, contributed to the design of the study and interpretation of the results, and drafted and reviewed the paper. EV and ECvD performed data analyses, contributed to the interpretation of the data, and reviewed the paper. MGHvO contributed to the design of the study and analysis plan, and interpretation of the results, and reviewed the paper.

**Conflicts of interest**

This study was funded by Astra Zeneca. The institute of JK and LvD received research funding from Astra Zeneca and Bristol-Myers Squibb for a study not related to this study. MGHvO has served as a consultant for AstraZeneca and Pfizer, and has received unrestricted research grants from AstraZeneca, Shire and Janssen.

**Funding:**

The sponsor of the study, AstraZeneca, had no decisive role in design and conduct of the study, collection, analysis, or interpretation of the data, or decision to submit the manuscript for publication.

JK and LvD had full access to all data in the study and take responsibility for the integrity of the data and accuracy of the data analysis. All authors had final responsibility for the decision to submit for publication

**Data sharing statement:** No additional data are available

**Ethics approval:** The privacy regulation of LINH was approved by the Dutch Data Protection Authority. According to Dutch legislation, neither obtaining informed consent nor approval by a medical ethics committee is obligatory for database studies

### Copyright

The Corresponding Author has the right to grant on behalf of all authors and does grant on behalf of all authors, a worldwide licence to the Publishers and its licensees in perpetuity, in all forms, formats and media (whether known now or created in the future), to i) publish, reproduce, distribute, display and store the Contribution, ii) translate the Contribution into other languages, create adaptations, reprints, include within collections and create summaries, extracts and/or, abstracts of the Contribution, iii) create any other derivative work(s) based on the Contribution, iv) to exploit all subsidiary rights in the Contribution, v) the inclusion of electronic links from the Contribution to third party material where-ever it may be located; and, vi) licence any third party to do any or all of the above.”

**Table 1. Characteristics of regular low-dose aspirin users with low risk of gastrointestinal complications and low-dose aspirin users with an increased risk of gastrointestinal complications, based upon HARM-wrestling recommendations**

|                                                                                                                                     | Patients with increased risk of GI complications<br>N = 3 213 | Patients with low risk of GI complications<br>N = 9 130 | p-value** |
|-------------------------------------------------------------------------------------------------------------------------------------|---------------------------------------------------------------|---------------------------------------------------------|-----------|
| <b>Risk factors for GI complications at first prescription of LDASA (%)<sup>*,†</sup></b>                                           |                                                               |                                                         |           |
| > 80 years old                                                                                                                      | 2 543 (79.1)                                                  | NA                                                      | NA        |
| > 70 years old and simultaneous use of NSAIDs, oral anticoagulants, glucocorticosteroids, SSRIs and/or spironolacton <sup>‡,§</sup> | 623 (19.4)                                                    | NA                                                      | NA        |
| > 60 years old and history of an ulcer                                                                                              | 47 (1.5)                                                      | NA                                                      | NA        |
| <b>Sex (%)</b>                                                                                                                      |                                                               |                                                         |           |
| Men                                                                                                                                 | 1 283 (39.9)                                                  | 5 352 (58.6)                                            | <0.0001   |
| <b>Age (yrs.) (SD)</b>                                                                                                              | 82.6 (6.1)                                                    | 62.1 (10.8)                                             | <0.0001   |
| <b>LDASA plus PPI use (%)<sup>  </sup></b>                                                                                          |                                                               |                                                         |           |
| No user of PPI                                                                                                                      | 1 142 (35.5)                                                  | 4 541 (49.8)                                            | <0.0001   |
| Regular user of PPI                                                                                                                 | 1 480 (46.1)                                                  | 2 724 (29.8)                                            |           |
| Irregular user of PPI                                                                                                               | 591 (18.4)                                                    | 1 865 (20.4)                                            |           |
| <b>Co-morbidity (%)<sup>†</sup></b>                                                                                                 |                                                               |                                                         |           |
| <b>Gastrointestinal tract</b>                                                                                                       |                                                               |                                                         |           |
| Gastrointestinal complications                                                                                                      | 664 (20.7)                                                    | 1 475 (16.2)                                            | <0.0001   |
| Duodenal ulcer                                                                                                                      | 24 (0.8)                                                      | 21 (0.2)                                                | <0.0001   |
| Peptic ulcer                                                                                                                        | 34 (1.1)                                                      | 11 (0.1)                                                | <0.0001   |
| Hiatus Hernia                                                                                                                       | 29 (0.9)                                                      | 58 (0.6)                                                | 0.13      |
| Heart burn                                                                                                                          | 75 (2.3)                                                      | 233 (2.6)                                               | 0.52      |
| Haematemesis                                                                                                                        | 7 (0.2)                                                       | 10 (0.1)                                                | 0.19      |
| Rectal bleeding                                                                                                                     | 50 (1.6)                                                      | 97 (1.1)                                                | 0.04      |
| <b>Cardiovascular diseases</b>                                                                                                      |                                                               |                                                         |           |
| Cardiovascular diseases**                                                                                                           | 1 584 (49.3)                                                  | 4 196 (46.0)                                            | 0.002     |
| Acute myocardial infarction                                                                                                         | 223 (6.9)                                                     | 792 (8.7)                                               | 0.003     |
| Heart failure                                                                                                                       | 432 (13.5)                                                    | 257 (2.8)                                               | <0.0001   |
| Atrial fibrillation                                                                                                                 | 237 (7.4)                                                     | 509 (5.6)                                               | 0.0003    |
| Ischaemic heart disease w. angina                                                                                                   | 476 (14.8)                                                    | 1 328 (14.6)                                            | 0.72      |
| Ischaemic heart disease w/o angina                                                                                                  | 173 (5.4)                                                     | 638 (7.0)                                               | 0.003     |
| Atherosclerosis                                                                                                                     | 176 (5.5)                                                     | 644 (7.1)                                               | 0.003     |
| Cerebrovascular diseases**                                                                                                          | 756 (23.5)                                                    | 1 480 (16.2)                                            | <0.0001   |
| Stroke                                                                                                                              | 362 (11.3)                                                    | 731 (8.0)                                               | <0.0001   |
| Transient Ischaemic Attack (TIA)                                                                                                    | 326 (10.2)                                                    | 541 (5.9)                                               | <0.0001   |
| Hypertension                                                                                                                        | 1 307 (40.7)                                                  | 3 546 (38.8)                                            | 0.08      |
| Diabetes Mellitus                                                                                                                   | 779 (24.3)                                                    | 1 960 (21.5)                                            | 0.002     |
| Hypercholesteroleamia                                                                                                               | 1 567 (48.8)                                                  | 6 374 (69.8)                                            | <0.0001   |
| <b>Co-medication (%)<sup>†</sup></b>                                                                                                |                                                               |                                                         |           |
| Other drugs for acid related disorders                                                                                              | 196 (6.1)                                                     | 477 (5.2)                                               | 0.07      |
| Drugs for functional gastrointestinal disorders                                                                                     | 277 (8.6)                                                     | 544 (6.0)                                               | <0.0001   |
| Cardiac therapy                                                                                                                     | 964 (30.0)                                                    | 2 152 (23.6)                                            | <0.0001   |
| Antihypertensive agents                                                                                                             | 2 748 (85.5)                                                  | 7 357 (80.6)                                            | <0.0001   |
| Antihypertensives                                                                                                                   | 55 (1.7)                                                      | 171 (1.9)                                               | 0.58      |
| Diuretics                                                                                                                           | 1 594 (49.6)                                                  | 2 456 (26.9)                                            | <0.0001   |

|                           |              |              |         |
|---------------------------|--------------|--------------|---------|
| Beta blocking agents      | 1 728 (53.8) | 5 250 (57.5) | 0.0005  |
| Calcium channel blockers  | 825 (25.7)   | 2 113 (23.1) | 0.005   |
| RAAS agents <sup>††</sup> | 1 672 (52.0) | 4 616 (50.6) | 0.17    |
| Peripheral vasodilators   | 4 (0.1)      | 11 (0.1)     | 1.00    |
| Vasoprotectives           | 103 (3.2)    | 232 (2.5)    | 0.06    |
| Lipid modifying agents    | 1 557 (48.5) | 6 311 (69.1) | <0.0001 |
| Antidiabetics             | 624 (19.4)   | 1 604 (17.6) | 0.03    |

<sup>\*</sup>GI: gastrointestinal

<sup>†</sup>LDASA: low-dose acetylsalicylic acid

<sup>\*</sup>NSAIDs: non-steroidal anti-inflammatory drugs

<sup>§</sup>SSRIs: selective serotonin reuptake inhibitors

<sup>||</sup>PPIs: proton pump inhibitors

<sup>¶</sup>Determined in the year before and after the first prescription of LDASA

<sup>\*\*</sup>not all indications are included, only the major ones

<sup>††</sup>RAAS: renin-angiotensin-aldosterone system

<sup>\*\*†</sup>p-values are corrected for multiple testing by using false discovery rate.

**Table 2. Characteristics of regular low-dose aspirin users and low-dose aspirin plus irregular and regular proton pump inhibitors users, stratified by time of proton pump inhibitor use**

|                                                 | No Use of LDASA*<br>N = 5 683 | Irregular use of PPI†<br>N = 2 456 | Regular use of PPI<br>N = 4 204       |                                           |                                         | p-value** |
|-------------------------------------------------|-------------------------------|------------------------------------|---------------------------------------|-------------------------------------------|-----------------------------------------|-----------|
|                                                 |                               |                                    | Previous starters of PPI<br>N = 2 015 | Simultaneous starters of PPI<br>N = 1 064 | Subsequent starters of PPI<br>N = 1 125 |           |
| <b>Age</b>                                      |                               |                                    |                                       |                                           |                                         |           |
| 18-50                                           | 599 (10.5)                    | 208 (8.5)                          | 176 (8.7)                             | 58 (5.4)                                  | 81 (7.2)                                | <0.0001   |
| 51-65                                           | 2 026 (35.7)                  | 829 (33.8)                         | 592 (29.4)                            | 292 (27.4)                                | 331 (29.4)                              |           |
| 66-80                                           | 2 163 (38.1)                  | 1 043 (42.5)                       | 801 (39.8)                            | 424 (39.9)                                | 494 (43.9)                              |           |
| 80+                                             | 895 (15.8)                    | 376 (15.3)                         | 446 (2.1)                             | 290 (27.3)                                | 219 (19.5)                              |           |
| <b>Sex</b>                                      |                               |                                    |                                       |                                           |                                         |           |
| Men                                             | 3 308 (58.2)                  | 1 288 (52.4)                       | 912 (45.3)                            | 530 (49.8)                                | 597 (53.1)                              | <0.0001   |
| <b>Risk of GI complications (%)‡,  </b>         |                               |                                    |                                       |                                           |                                         |           |
| Increased risk of GI complications              | 1 142 (20.1)                  | 591 (24.1)                         | 756 (37.5)                            | 414 (38.9)                                | 310 (27.6)                              | <0.0001   |
| Low risk of GI complications                    | 4 541 (79.9)                  | 1 865 (75.9)                       | 1 259 (62.5)                          | 650 (61.1)                                | 815 (72.4)                              |           |
| <b>Co-morbidity (%)§</b>                        |                               |                                    |                                       |                                           |                                         |           |
| Gastrointestinal complications                  | 214 (3.8)                     | 594 (24.2)                         | 831 (41.2)                            | 217 (20.4)                                | 283 (25.2)                              | <0.0001   |
| Ulcers                                          | 6 (0.1)                       | 24 (1.0)                           | 38 (1.9)                              | 9 (0.9)                                   | 13 (1.2)                                | <0.0001   |
| Cardiovascular diseases                         | 2 447 (43.6)                  | 1 190 (48.5)                       | 1 110 (55.1)                          | 456 (42.9)                                | 547 (48.6)                              | <0.0001   |
| Cerebrovascular diseases                        | 1 052 (18.5)                  | 400 (16.3)                         | 406 (20.2)                            | 171 (16.1)                                | 207 (18.4)                              | 0.007     |
| Hypertension                                    | 2 221 (39.1)                  | 989 (40.3)                         | 831 (41.2)                            | 335 (31.5)                                | 477 (42.4)                              | <0.0001   |
| Diabetes Mellitus                               | 1 189 (20.9)                  | 544 (22.2)                         | 458 (22.7)                            | 292 (27.4)                                | 256 (22.8)                              | 0.0001    |
| Hypercholesterolaemia                           | 3 600 (63.4)                  | 1 592 (64.8)                       | 1 302 (64.6)                          | 721 (67.8)                                | 726 (64.5)                              | 0.09      |
| <b>Co-medication (%)§</b>                       |                               |                                    |                                       |                                           |                                         |           |
| Other drugs for acid related disorders          | 227 (4.0)                     | 144 (5.9)                          | 163 (8.1)                             | 54 (5.1)                                  | 85 (7.6)                                | <0.0001   |
| Drugs for functional gastrointestinal disorders | 151 (2.7)                     | 211 (8.6)                          | 275 (13.7)                            | 83 (7.8)                                  | 101 (9.0)                               | <0.0001   |
| Cardiac therapy                                 | 1 142 (20.1)                  | 664 (27.0)                         | 672 (33.4)                            | 324 (30.5)                                | 314 (27.9)                              | <0.0001   |
| Antihypertensive agents                         | 4 523 (79.6)                  | 1 997 (81.3)                       | 1 721 (85.4)                          | 912 (85.7)                                | 952 (84.6)                              | <0.0001   |
| Antihypertensives                               | 102 (1.8)                     | 36 (1.5)                           | 44 (2.2)                              | 22 (2.1)                                  | 22 (2.0)                                | 0.48      |
| Diuretics                                       | 1 607 (28.3)                  | 782 (31.8)                         | 826 (41.0)                            | 410 (38.5)                                | 425 (37.8)                              | <0.0001   |
| Beta blocking agents                            | 3 078 (54.2)                  | 1 370 (55.8)                       | 1 255 (62.3)                          | 633 (59.5)                                | 642 (57.1)                              | <0.0001   |
| Calcium channel blockers                        | 1 078 (21.5)                  | 571 (23.3)                         | 551 (27.3)                            | 286 (26.9)                                | 309 (27.5)                              | <0.0001   |
| RAAS agents¶                                    | 3 221 (49.3)                  | 1 205 (49.6)                       | 1 081 (53.7)                          | 576 (54.1)                                | 624 (55.5)                              | <0.0001   |
| Vasoprotectives                                 | 111 (2.0)                     | 77 (3.1)                           | 84 (4.2)                              | 25 (2.4)                                  | 38 (3.4)                                | <0.0001   |
| Lipid modifying agents                          | 3 568 (62.8)                  | 1 578 (64.3)                       | 1 288 (63.9)                          | 717 (67.4)                                | 717 (63.7)                              | 0.08      |
| Antidiabetics                                   | 974 (17.1)                    | 420 (17.1)                         | 378 (18.8)                            | 244 (22.9)                                | 212 (18.8)                              | 0.0001    |

\*LDASA: low-dose acetylsalicylic acid

†PPIs: proton pump inhibitors

‡Based upon HARM-WRESTLING recommendations: patients who are &gt; 80 years old, or &gt; 70 years old and simultaneous use of non-steroidal anti-inflammatory drugs (NSAIDs), oral anticoagulants, glucocorticosteroids, selective serotonin reuptake inhibitors (SSRIs) and/or spironolacton, or &gt; 60 years old and history of an ulcer.

§Determined in the year before and after the first prescription of LDASA

||GI: gastrointestinal

¶RAAS: renin-angiotensin-aldosterone system

\*\*p-values relate to the comparison of the five groups, and are corrected for multiple testing by using false discovery rate.

**Table 3. The probability of receiving a proton pump inhibitor regularly versus no PPI in patients treated regularly with low-dose aspirin**

|                                                               | LDASA users<br>(N = 9 887) <sup>†</sup>             |                                          |                       |
|---------------------------------------------------------------|-----------------------------------------------------|------------------------------------------|-----------------------|
|                                                               | Univariate<br>analysis<br>(OR; 95% CI) <sup>†</sup> | Multivariate<br>analysis<br>(OR; 95% CI) | p-value <sup>  </sup> |
| Age (ref = 18-50)                                             |                                                     |                                          |                       |
| 51-65                                                         | 1.28 (1.13 – 1.46)                                  | 1.09 (0.91 – 1.31)                       | 0.39                  |
| 66-80                                                         | 1.77 (1.56 – 2.00)                                  | 1.54 (1.28 – 1.84)                       | <0.0001               |
| 80+                                                           | 2.16 (1.88 – 2.48)                                  | 1.88 (1.54 – 2.30)                       | <0.0001               |
| Gender (ref = male)                                           | 1.48 (1.38 – 1.59)                                  | 1.26 (1.15 – 1.39)                       | <0.0001               |
| Increased risk of GI complications (ref = low) <sup>‡,§</sup> | 2.15 (1.99 – 2.33)                                  |                                          |                       |
| NSAIDs                                                        | 4.05 (3.72 – 4.41)                                  | 5.20 (4.31 – 6.28)                       | <0.0001               |
| Oral anticoagulants                                           | 1.48 (1.30 – 1.68)                                  | 1.46 (1.12 – 1.90)                       | 0.008                 |
| Glucocorticosteroids                                          | 4.39 (3.92 – 4.91)                                  | 6.06 (4.59 – 7.99)                       | <0.0001               |
| SSRIs                                                         | 5.88 (4.95 – 6.99)                                  | 9.07 (6.73 – 12.22)                      | <0.0001               |
| Spironolacton                                                 | 2.46 (2.04 – 2.96)                                  | 1.64 (1.22 – 2.22)                       | 0.002                 |
| Ulcer                                                         | 13.09 (6.75 – 25.40)                                |                                          |                       |
| Gastrointestinal complications                                | 14.88 (13.08 – 16.93)                               | 13.89 (11.78 – 16.37)                    | <0.0001               |
| Cardiovascular diseases                                       | 1.37 (1.27 – 1.47)                                  |                                          |                       |
| Cerebrovascular diseases                                      | 0.98 (0.89 – 1.07)                                  |                                          |                       |
| Hypertension                                                  | 1.13 (1.05 – 1.22)                                  | 0.83 (0.75 – 0.92)                       | 0.001                 |
| Diabetes Mellitus                                             | 1.21 (1.11 – 1.31)                                  |                                          |                       |
| Hypercholesterolemia                                          | 1.19 (1.11 – 1.28)                                  | 1.19 (1.07 – 1.32)                       | 0.003                 |
| Other drugs for acid related disorders                        | 1.84 (1.58 – 2.13)                                  |                                          |                       |
| Drugs for functional gastrointestinal disorders               | 4.62 (3.96 – 5.40)                                  | 2.40 (1.92 – 3.00)                       | <0.0001               |
| Cardiac therapy                                               | 1.85 (1.71 – 2.00)                                  | 1.55 (1.39 – 1.73)                       | <0.0001               |
| Antihypertensive agents                                       | 1.62 (1.48 – 1.77)                                  | 1.34 (1.17 – 1.55)                       | <0.0001               |
| Vasoprotectives                                               | 1.91 (1.55 – 2.33)                                  | 1.42 (1.06 – 1.91)                       | 0.03                  |
| Lipid modifying agents                                        | 1.18 (1.10 – 1.27)                                  |                                          |                       |
| Antidiabetics                                                 | 1.22 (1.11 – 1.33)                                  | 1.11 (0.98 – 1.26)                       | 0.1                   |

<sup>\*</sup>LDASA: low-dose acetylsalicylic acid, limited to the No use of PPI and regular users of PPI

<sup>†</sup>OR: odds ratio, CI: confidence interval

<sup>‡</sup>GI: gastrointestinal

<sup>§</sup>Based upon HARM-WRESTLING recommendations: patients who are > 80 years old, or > 70 years old and simultaneous use of non-steroidal anti-inflammatory drugs (NSAIDs), oral anticoagulants, glucocorticosteroids, selective serotonin reuptake inhibitors (SSRIs) and/or spironolacton, or > 60 years old and history of an ulcer.

<sup>||</sup>p-values presented are for the multivariate analyses and are corrected for multiple testing by using false discovery rate.

1  
2  
3 **Figure 1. Study flow diagram**  
4

5 LDASA, low-dose acetylsalicylic acid; GI, gastrointestinal; PPI, proton pump inhibitors; reg., regular; irreg.,  
6 irregular  
7  
8  
9  
10  
11  
12  
13

14  
15  
16  
17 **Reference List**  
18

- 19 (1) World Health Organisation. Global atlas on cardiovascular disease prevention and  
20 control. 10-1-2012.  
21  
22  
23 (2) Antithrombotic Trialists' Collaboration. Collaborative meta-analysis of randomised  
24 trials of antiplatelet therapy for prevention of death, myocardial infarction, and stroke  
25 in high risk patients. *BMJ* 2002; 324(7329):71-86.  
26  
27 (3) Baigent C, Blackwell L, Collins R, et al. Aspirin in the primary and secondary  
28 prevention of vascular disease: collaborative meta-analysis of individual participant  
29 data from randomised trials. *Lancet* 2009; 373(9678):1849-1860.  
30  
31 (4) Chen ZM, Sandercock P, Pan HC, et al. Indications for early aspirin use in acute  
32 ischemic stroke : A combined analysis of 40 000 randomized patients from the chinese  
33 acute stroke trial and the international stroke trial. On behalf of the CAST and IST  
34 collaborative groups. *Stroke* 2000; 31(6):1240-1249.  
35  
36 (5) Wolff T, Miller T, Ko S. Aspirin for the primary prevention of cardiovascular events:  
37 an update of the evidence for the U.S. Preventive Services Task Force. *Ann Intern*  
38 *Med* 2009; 150(6):405-410.  
39  
40 (6) McQuaid KR, Laine L. Systematic review and meta-analysis of adverse events of low-  
41 dose aspirin and clopidogrel in randomized controlled trials. *Am J Med* 2006;  
42 119(8):624-638.  
43  
44 (7) Yeomans ND, Lanas AI, Talley NJ, et al. Prevalence and incidence of gastroduodenal  
45 ulcers during treatment with vascular protective doses of aspirin. *Aliment Pharmacol*  
46 *Ther* 2005; 22(9):795-801.  
47  
48 (8) Hsiao FY, Tsai YW, Huang WF, et al. A comparison of aspirin and clopidogrel with  
49 or without proton pump inhibitors for the secondary prevention of cardiovascular  
50 events in patients at high risk for gastrointestinal bleeding. *Clin Ther* 2009;  
51 31(9):2038-2047.  
52  
53 (9) Ng FH, Wong SY, Lam KF, Chu WM, et al. Famotidine is inferior to pantoprazole in  
54 preventing recurrence of aspirin-related peptic ulcers or erosions. *Gastroenterology*  
55 2010; 138(1):82-88.  
56  
57  
58  
59  
60

- 1  
2  
3 (10) Scheiman JM, Devereaux PJ, Herlitz J, et al. Prevention of peptic ulcers with  
4 esomeprazole in patients at risk of ulcer development treated with low-dose  
5 acetylsalicylic acid: a randomised, controlled trial (OBERON). *Heart* 2011;  
6 97(10):797-802.  
7
- 8  
9 (11) Yeomans ND. Reducing the risk of gastroduodenal ulcers with a fixed combination of  
10 esomeprazole and low-dose acetyl salicylic acid. *Expert Rev Gastroenterol Hepatol*  
11 2011; 5(4):447-455.  
12
- 13 (12) Bhatt DL, Scheiman J, Abraham NS, et al. ACCF/ACG/AHA 2008 expert consensus  
14 document on reducing the gastrointestinal risks of antiplatelet therapy and NSAID use:  
15 a report of the American College of Cardiology Foundation Task Force on Clinical  
16 Expert Consensus Documents. *Circulation* 2008; 118(18):1894-1909.  
17
- 18 (13) Hamm CW, Bassand JP, Agewall S, et al. ESC Guidelines for the management of  
19 acute coronary syndromes in patients presenting without persistent ST-segment  
20 elevation: The Task Force for the management of acute coronary syndromes (ACS) in  
21 patients presenting without persistent ST-segment elevation of the European Society  
22 of Cardiology (ESC). *Eur Heart J* 2011; 32(23):2999-3054.  
23
- 24 (14) Ministerie van Volksgezondheid WeS. Een voorstel van de Expertgroep  
25 Medicatieveiligheid met betrekking tot concrete interventies die de extramurale  
26 medicatieveiligheid op korte termijn kunnen verbeteren. HARM-WRESTLING.  
27 2009. Den Haag, The Netherlands.  
28
- 29 (15) NICE. Acute upper gastrointestinal bleedings: management. NICE clinical guideline  
30 141. 2012.  
31  
32
- 33 (16) Abraham NS, Hlatky MA, Antman EM, et al. ACCF/ACG/AHA 2010 expert  
34 consensus document on the concomitant use of proton pump inhibitors and  
35 thienopyridines: a focused update of the ACCF/ACG/AHA 2008 expert consensus  
36 document on reducing the gastrointestinal risks of antiplatelet therapy and NSAID use.  
37 A Report of the American College of Cardiology Foundation Task Force on Expert  
38 Consensus Documents. *J Am Coll Cardiol* 2010; 56(24):2051-2066.  
39
- 40 (17) Valkhoff VE, van Soest EM, Sturkenboom MC, et al. Time-trends in gastroprotection  
41 with nonsteroidal anti-inflammatory drugs (NSAIDs). *Aliment Pharmacol Ther* 2010;  
42 31(11):1218-1228.  
43
- 44 (18) Hartnell NR, Flanagan PS, Mackinnon NJ, et al. Use of gastrointestinal preventive  
45 therapy among elderly persons receiving antiarthritic agents in Nova Scotia, Canada.  
46 *Am J Geriatr Pharmacother* 2004; 2(3):171-180.  
47
- 48 (19) Sturkenboom MC, Burke TA, Dieleman JP, et al. Underutilization of preventive  
49 strategies in patients receiving NSAIDs. *Rheumatology (Oxford)* 2003; 42 Suppl  
50 3:iii23-iii31.  
51
- 52 (20) Lanas A, Plazas MA, Gimeno E, et al. Gastroprotection in NSAID and low-dose  
53 aspirin users: a cross-sectional study in primary care. *Gastroenterol Hepatol* 2012;  
54 35(1):1-7.  
55  
56  
57  
58  
59  
60



- 1  
2  
3 (21) Bianco MA, Rotondano G, Buri L, et al. Gastro-protective strategies in primary care in  
4 Italy: the "Gas.Pro." survey. *Dig Liver Dis* 2010; 42(5):359-364.  
5  
6 (22) Stirbu-Wagner I, Dorsman SA, Visscher S, et al. Netherlands Information Network of  
7 General Practice (LINH). 2012. Utrecht / Nijmegen, NIVEL/IQ.  
8  
9  
10 (23) Schellevis FG, Westert GP, De Bakker DH. [The actual role of general practice in the  
11 dutch health-care system. Results of the second dutch national survey of general  
12 practice]. *Med Klin (Munich)* 2005; 100(10):656-661.  
13  
14 (24) World Health Organisation. Guidelines for ATC classification and DDD assignment.  
15 Oslo: WHO Collaborating Centre for Drug Statistics Methodology - Nordic Council  
16 on Medicines; 1999.  
17  
18 (25) Lamberts H, Wood M. ICPC. International Classification of Primary Care. Oxford:  
19 Oxford University Press; 1987.  
20  
21 (26) Derry S, Loke YK. Risk of gastrointestinal haemorrhage with long term use of aspirin:  
22 meta-analysis. *BMJ* 2000; 321(7270):1183-1187.  
23  
24 (27) Leonard J, Marshall JK, Moayyedi P. Systematic review of the risk of enteric infection  
25 in patients taking acid suppression. *Am J Gastroenterol* 2007; 102(9):2047-2056.  
26  
27 (28) Laheij RJ, Sturkenboom MC, Hassing RJ, et al. Risk of community-acquired  
28 pneumonia and use of gastric acid-suppressive drugs. *JAMA* 2004; 292(16):1955-  
29 1960.  
30  
31 (29) Yang YX, Lewis JD, Epstein S, et al. Long-term proton pump inhibitor therapy and  
32 risk of hip fracture. *JAMA* 2006; 296(24):2947-2953.  
33  
34 (30) Richtlijn overdracht van medicatie gegevens in de keten. 2008. VWS and IGZ.  
35  
36 (31) Kvamme OJ, Olesen F, Samuelson M. Improving the interface between primary and  
37 secondary care: a statement from the European Working Party on Quality in Family  
38 Practice (EQuiP). *Qual Health Care* 2001; 10(1):33-39.  
39  
40  
41  
42  
43  
44  
45  
46  
47  
48  
49  
50  
51  
52  
53  
54  
55  
56  
57  
58  
59  
60

1  
2  
3 **Suboptimal prescribing of proton pump inhibitors in low-dose aspirin users; a cohort**  
4  
5 **study in primary care.**  
6

7 Hilda JI De Jong, Joke C Korevaar, Liset Van Dijk, Eef Voogd, Christel E Van Dijk, Martijn

8  
9 GH Van Oijen  
10

11  
12  
13  
14 **Affiliates**

15  
16 NIVEL, Netherlands Institute for Health Services Research, Utrecht, The Netherlands, Hilda  
17 de Jong PhD-student, Joke Korevaar Research Coordinator General Practice Care, Liset van  
18 Dijk Research Coordinator Pharmaceutical Care, Eef Voogd PhD-student, Christel van Dijk  
19 Senior researcher.  
20

21  
22 Division of Digestive Diseases, David Geffen School of Medicine, UCLA, Los Angeles,  
23 California, USA and UCLA/VA Center for Outcomes Research and Education (CORE), Los  
24 Angeles, California, USA, Martijn van Oijen assistant professor.  
25  
26  
27  
28  
29  
30  
31  
32  
33

34 **Corresponding author**

35 JC Korevaar  
36 P.O. Box 1568  
37 3500 BN Utrecht  
38 The Netherlands  
39 +31 30 27 29 711  
40 j.korevaar@nivel.nl  
41  
42  
43

44 **Keywords:** low-dose aspirin, proton pump inhibitors, GI complications, primary care  
45

46 **Wordcount:** 3089  
47

48 **Funding:** AstraZeneca; NIVEL  
49

50 **Short title:** suboptimal prescribing of PPIs in LDASA users in primary care  
51  
52  
53  
54  
55  
56  
57  
58  
59  
60

**Abstract****Objective**

Determine the adherence to recommendations of concomitant PPI treatment in regular LDASA users, taking factors associated with the probability of receiving a PPI into account.

**Design**

Cohort study

**Setting**

Data were obtained from 120 Dutch primary care centres participating in the Netherlands Information Network of Primary Care (LINH).

**Participants**

Patients 18 years and older who were regularly prescribed LDASA (30-325 mg) in 2008-2010 were included.

**Main outcome measures**

Regular medication use was defined as receiving each consecutive prescription within 6 months after the previous one. Based upon national guidelines, we categorised LDASA users into low and high GI risk. A multilevel multivariable logistic regression analysis was applied to identify patient characteristics that influenced on the probability of regular PPI prescriptions.

## Results

We identified 12,343 patients who started LDASA treatment, of whom 3,213 (26%) were at increased risk of GI complications. In this group, concomitant regular use of PPI was 46%, 36% did not receive PPI prescriptions and 18% obtained prescriptions irregularly ( $p < 0.0001$ ). The chance to obtain regularly PPI prescriptions versus no PPI was significantly influenced by, among others, previous GI complications (OR 13.9 [95%CI: 11.8 – 16.4]), use of NSAIDs (OR: 5.2 [4.3-6.3]), glucocorticosteroids (6.1 [4.6-8.0]), SSRIs (9.1 [6.7-12.2]), drugs for functional GI disorders (2.4 [1.9-3.0]) and increased age.

## Conclusion

Primary care physicians do not fully adhere to the current recommendations to prescribe PPIs regularly to LDASA users with an increased GI risk. More than 50% of the patients with an increased GI risk are not treated sufficiently with a concomitant PPI, increasing the risk of gastrointestinal side effects. This finding underlines the necessity to consider merging recommendations into one common, standard and frequently used recommendation by primary care physicians.

## Article Summary

### *Article focus*

- LDASA use is associated with a wide variety of gastrointestinal (GI) side effects.
- Concomitant use of PPIs for patients who are at increased risk for GI complications is advised
- Adherence and persistence of PPI use in primary care of patients using LDASA frequently is still indefinite

### *Key messages*

- Primary care physicians do not fully adhere to the current recommendations to prescribe PPIs regularly to LDASA users with an increased GI risk
- Concomitant regular use of PPI with LDASA in patients with an increased GI risk was 46% in primary care
- 36% of the LDASA users with an increased GI risk and treated in primary care, obtained no PPI prescriptions, and 18% obtained prescriptions irregular

### *Strengths and limitations of this study*

- Large representative sample of patients monitored in daily practice in primary care
- No information available why patients with an increased GI risk did not obtain PPI prescriptions, or why they became an irregular PPI user

## Introduction

Worldwide, the number of deaths from cardiovascular disease was estimated at 17.3 million in 2008, and it is expected to increase to approximately 23.6 million by 2030<sup>1</sup>. Treatment with low-dose of aspirin (LDASA) is recommended for the prevention of cardiovascular events in patients with a history of myocardial infarction, stroke, transient ischaemic attack or (in)stable angina<sup>2-4</sup>. While LDASA use is associated with a decreased risk of cardiovascular events<sup>5</sup>, its use is also associated with a wide variety of gastrointestinal (GI) side effects, such as dyspepsia, peptic ulcers, and upper and lower GI bleedings<sup>6;7</sup>.

GI complications associated with LDASA use are more frequently present in patients who are older than 70 years, have a history of peptic ulcer, have had an infection with *Helicobacter pylori*, and/or used concomitant drug therapies with non-steroidal anti-inflammatory drugs (NSAIDs), including cyclooxygenase-2 (COX-2) inhibitors, other antiplatelet agents or anticoagulants, glucocorticosteroids, and/or selective serotonin reuptake inhibitors (SSRIs)<sup>6;7</sup>. Concomitant proton pump inhibitor (PPI) therapy is associated with a reduction of the risk of GI complications<sup>8-11</sup>.

Therefore, concomitant use of PPIs for patients who use regular LDASA and are at increased risk for GI complications has been described in guidelines from medical societies and scientific associations from both the USA and Europe<sup>12;13</sup>. In the Netherlands - the setting of our study - an expert group with a focus on optimising extramural medication safety published specific recommendations for adequate gastrointestinal protection, i.e. prescribing PPIs in regular LDASA users with an increased risk of GI complications in 2008, which was finalised in 2009<sup>14</sup>. These recommendations are in line with the US, NICE and ESC guidelines<sup>12;13;15</sup>, and describe that PPIs are the preferred agents for the therapy and

1  
2  
3 prophylaxis of aspirin-associated GI injury<sup>12</sup>. Risk reduction due to PPI treatment observed in  
4  
5 case-control and cohort studies ranged in most cases from 40 to 80%.<sup>16</sup>  
6  
7

8  
9  
10 Several observational studies described the use of concomitant PPI in a patients receiving  
11  
12 NSAID including aspirin, and showed that 67-90% of the users with at least one risk factor  
13  
14 did not receive gastroprotective therapy as recommended<sup>17 18;19</sup>. Two studies focussed on  
15  
16 LDASA patients; in one study the definition of increased GI risk was limited, namely a  
17  
18 positive *Helicobacter pylori* status, the other study had a small sample size of LDASA  
19  
20 patients.<sup>20;21</sup>. Although evidence regarding the adherence to concomitant PPI use in patients  
21  
22 with an increased risk for GI complications is increasing, the adherence and persistence of PPI  
23  
24 use is still indefinite.  
25  
26

27  
28  
29 The objective of this study is to determine the adherence to recommendations of concomitant  
30  
31 PPI treatment in regular LDASA users, taking factors associated with the probability of  
32  
33 receiving a PPI into account.  
34  
35  
36  
37  
38  
39  
40  
41  
42  
43  
44  
45  
46  
47  
48  
49  
50  
51  
52  
53  
54  
55  
56  
57  
58  
59  
60

## Methods

Data were obtained from the Netherlands Information Network of Primary Care Physicians (LINH), a database derived from primary care centres that record data on morbidity, and drug prescriptions on continuous basis in electronic medical records (EMR). The LINH network consists of a dynamic cohort of 700,000 patients who are registered at 120 centres<sup>22</sup>. The network is a representative sample of the Dutch population, it started in 2001 and registration is still on-going.<sup>22</sup> In the Netherlands, all citizens are registered with a primary care physician who act as a gatekeeper for access to specialised care<sup>23</sup>.

Prescription data were classified according to the Anatomical Therapeutic and Chemical (ATC) classification<sup>24</sup>, and morbidity was coded by using the International Classification of Primary Care (ICPC) scheme<sup>25</sup>. The privacy regulation of LINH was approved by the Dutch Data Protection Authority. According to Dutch legislation, neither obtaining informed consent nor approval by a medical ethics committee is obligatory for database studies.

In this longitudinal, observational study, all patients aged 18 years and older who started with regular use of LDASA (30-325 mg) treatment between January 1, 2008, and December 31, 2010 were included under the condition that their history was available at least one year before the date of the first prescription of LDASA. This time period was chosen to confirm that no LDASA prescriptions were given in the year prior to inclusion. Regular use of LDASA was defined as receiving each consecutive prescription within six months after the previous one. A gap of maximal six months was chosen because in daily practice patients rarely collect a subsequent prescription exactly on the day their supply of their previous prescription has ended, normally 90 days, but rather earlier (overlap of two prescriptions) or later (gap between two prescriptions). In order not to bias our results towards irregular user



1  
2  
3 categorisation, we used a maximum period of six months. Irregular LDASA users, according  
4  
5 to our definition, were excluded from the analyses as well as users with just one LDASA  
6  
7 prescription. Aspirin therapy was identified by a prescription of acetylsalicylic acid (ATC-  
8  
9 codes B01AC06, N02BA01 and N02BA51), carbasalate calcium (B01AC08, N02BA15 and  
10  
11 N02BA65), or acetylsalicylic acid in combination with other drugs (B01AC30).

12  
13  
14  
15  
16 Based upon the HARM-WRESTLING recommendations<sup>14</sup>, we categorised new LDASA  
17  
18 users into low or increased risk of GI complications. Patients with an increased risk of GI  
19  
20 complications were identified by the following selection rules applied in consecutive order: 1)  
21  
22 80 years or older; 2) 70 years or older with simultaneous use of NSAIDs, oral anticoagulants,  
23  
24 platelet aggregation inhibitors, glucocorticosteroids, SSRIs and/or spironolacton; or 3) 60  
25  
26 years or older with a history of a peptic ulcer.  
27  
28

29  
30  
31 PPI treatment was identified by ATC-code A02BC. All patients were divided into three  
32  
33 categories: *no user*, *irregular*, or *regular* user of PPIs. Patients who never received a  
34  
35 prescription of PPI during the follow-up period were defined as *no PPI users*. In line with our  
36  
37 definition of a regular LDASA user, patients were defined as *regular PPI users* if they  
38  
39 received each consecutive prescription within 6 months after their previous one. All others  
40  
41 were considered as *irregular users*.  
42  
43  
44

45  
46  
47 We considered patients to be *previous starters of PPIs* when they received a prescription of  
48  
49 PPI in the year prior to the first prescription of LDASA. Patients who started the use of PPIs  
50  
51 within a week after the first prescription of LDASA were considered as *simultaneous starters*  
52  
53 *of PPIs*. Patients who received a prescription of PPI more than a week after the first  
54  
55 prescription of LDASA were *subsequent starters of PPIs*.  
56  
57  
58  
59  
60

1  
2  
3  
4  
5 Relevant co-morbidity was determined in the year before and after the date of the first  
6  
7 prescription of LDASA. Cardiovascular and cerebrovascular diseases were identified by  
8  
9 ICPC-codes K71, K73-K84, K89-K96 and K99. Hypertension was considered present when  
10  
11 the patient had a medical record of ICPC-codes K86 or K87. Patients were classified as  
12  
13 diabetic if a diagnosis code for diabetes (T90) was identified, or when they received anti-  
14  
15 diabetic therapy (ATC-codes A10A and A10B). Patients who had a diagnosis of lipid disorder  
16  
17 (T93) or when they received lipid modifying agents (C10) were considered as  
18  
19 hypercholesterolaemic. GI complications, including peptic ulcers, were identified by D02,  
20  
21 D03, D09, D10, D14, D16, D85-87, and D90 (Appendix I). To classify patients as having an  
22  
23 increased GI risk based on HARM-WRESTLING recommendation, we determined  
24  
25 prescriptions for NSAIDs (M01), including Cox-2 inhibitors, oral anticoagulants and platelet  
26  
27 aggregation inhibitors (B01AA and B01AC), glucocorticosteroids (H02AB and H02), and  
28  
29 SSRIs (N06AB) [16]. In addition, we identified all prescriptions for cardiovascular system  
30  
31 (C01-C10), acid related disorders (A02 (PPIs excluded)), and functional gastro-intestinal  
32  
33 disorders (A03) in the year before and after the date of the first LDASA prescription. Finally,  
34  
35 cardiac therapy was defined as a prescription of an ATC-code C01 in the year before or after  
36  
37 the first LDASA prescription.  
38  
39  
40  
41  
42  
43  
44

#### 45 *Statistical analysis*

46  
47 Differences between groups were tested with a Chi-square test. To identify the relative  
48  
49 influence of patient characteristics on the probability to obtain regular PPI prescriptions,  
50  
51 multilevel multivariable logistic regression analyses (backward elimination method) was  
52  
53 conducted. The models were estimated taking the clustering of patients (level 1) within  
54  
55 primary care centres (level 2) into account. The probability of receiving a PPI was determined  
56  
57  
58  
59  
60

1  
2  
3 by comparing no PPI users with regular PPI users. This analyses was performed without the  
4  
5 irregular users to rule out the effect of these users. In addition, separate analyses were  
6  
7 performed for increased GI risk patients. All data were analysed using the statistical programs  
8  
9 SAS version 9.2 (SAS Institute, Cary, North Carolina) and ‘Multilevel models for windows’  
10  
11 (MLwin 2.02). Adjustment for multiple testing was performed by using a False Discovery  
12  
13 Rate correction.  
14

15  
16  
17  
18 Choices of our definition of subsequent and simultaneous start of PPIs, and our period of  
19  
20 describing patients’ characteristics were based on assumptions, and therefore we tested the  
21  
22 robustness of our findings by performing sensitivity analyses. We made the definition of  
23  
24 simultaneous starters of PPIs more strictly, i.e. receiving a prescription of PPIs at exactly the  
25  
26 same date as the first prescription of LDASA. Secondly, we changed the medical and  
27  
28 prescription history into only one year before the date of the first LDASA prescription.  
29  
30 Thirdly, as LDASA therapy was frequently prescribed for patients with cardiovascular  
31  
32 diseases, a separate analysis with solely cardiovascular patients was conducted. Finally, we  
33  
34 investigated the influence of irregular users of PPIs into our analysis by performing two  
35  
36 analyses in which we (1) merged irregular users with regular users of PPIs and in which we  
37  
38 (2) added irregular users to the no PPI users group.  
39  
40  
41  
42  
43  
44

#### 45 *Role of the funding source*

46  
47 **The sponsor had no decisive role in the study, i.e. the sponsor thought along with the study**  
48  
49 **and supplied suggestions regarding the content of the study, but the sponsor was not involved**  
50  
51 **in the decisions regarding the analysis, the conduct of the study, nor the publication.** JK and  
52  
53  
54 LvD had full access to all data in the study and take responsibility for the integrity of the data  
55  
56  
57  
58  
59  
60

1  
2  
3  
4  
5  
6  
7  
8  
9  
10  
11  
12  
13  
14  
15  
16  
17  
18  
19  
20  
21  
22  
23  
24  
25  
26  
27  
28  
29  
30  
31  
32  
33  
34  
35  
36  
37  
38  
39  
40  
41  
42  
43  
44  
45  
46  
47  
48  
49  
50  
51  
52  
53  
54  
55  
56  
57  
58  
59  
60

and accuracy of the data analysis. All authors had final responsibility for the decision to submit for publication.

For peer review only

## Results

In the study population, 18,137 new LDASA users of 18 years and older were identified of whom 12,343 were regular users during the years 2008-2010 (Figure 1). Of these incident regular LDASA users, 3,213 (26.0%) were at increased risk for GI complications. The vast majority was at an increased GI risk due to their age. In total, 64.5% of the patients who were at increased GI risk obtained a PPI prescription; 46.1% was a regular and 18.4% an irregular user. In the group of patients with an increased GI risk without PPI prescription, the main reason for having an increased GI risk was age, above 80 years (n=994, 87%). Cardiovascular diseases are reported in almost half of the patients, and are significantly more prevalent among patients with increased GI risk (49.3% vs. 46.0%, p=0.002). The use of co-medication is generally higher in the increased GI risk group, with the exception of lipid modifying agents (Table 1).

In total, 4,204 (34.1%) patients were regular PPI users, 2,456 (19.9%) were irregular users, and 5,683 (46.0%) used no PPI (Table 2). Of the regular PPI users nearly half of the patients (48%) started PPI therapy previously, 25% started PPI therapy simultaneously, and 27% started subsequently. Patients that started PPI previously, more often were prescribed with drugs for functional gastrointestinal disorders or acid related disorders, cardiac therapy, diuretics, beta blocking agents, and vasoprotective agents.

Table 3 shows the probability of receiving regular PPI prescriptions versus no PPI usage. This probability is significantly increased by different risk factors for GI side effects, by morbidity, medication, and increased age. LDASA users with a history of gastrointestinal complications were more likely to receive regular PPI prescriptions (adjusted OR 13.9; 95% CI: 11.8-16.4), as was found for the different medications used to define patients with an increased GI risk.

1  
2  
3 Simultaneous use of SSRIs (adjusted OR 9.1 (6.7-12.2)), NSAIDs (5.2 (4.3-6.3)),  
4  
5 glucocorticosteroids (6.1 (4.6-8.0)), and being 80 years and older (1.9 (1.5-2.3)) were strongly  
6  
7 related to receiving a PPI regularly. Sensitivity analyses for the group with an increased GI  
8  
9 risk did not alter our findings; similar predicting factors influenced the probability with equal  
10  
11 magnitude, except for age. Age was no longer a predicting factor (data not shown).  
12  
13

14  
15  
16 Applying the different sensitivity analyses did not alter our findings.  
17  
18  
19  
20  
21  
22  
23  
24  
25  
26  
27  
28  
29  
30  
31  
32  
33  
34  
35  
36  
37  
38  
39  
40  
41  
42  
43  
44  
45  
46  
47  
48  
49  
50  
51  
52  
53  
54  
55  
56  
57  
58  
59  
60

## Discussion

We showed that 36% of the regular LDASA user who have an increased GI risk did not receive prescriptions for PPIs by their primary care physician at all, and another 18% were irregular PPI users. So, both groups (54%) were not treated according to recent recommendations. Several factors increased the probability to obtain PPI prescription regularly; most important factors were previous GI complications, use of SSRIs, NSAIDs, glucocorticosteroids, or drugs for functional gastro-intestinal disorders, and increased age. The majority of LDASA users started with the PPI treatment before the initiation of LDASA treatment.

A large primary care population-based cohort-study of 50,126 NSAID users between 1996 and 2006 showed that physicians are not always aware of the need for gastroprotection when prescribing NSAID. Almost 60% of new NSAID users with at least one GI risk factor and 52% of patients with a history of GI bleeding/ulceration were not prescribed any gastroprotective agent. These numbers are almost in the same range as our results; however, this study made no distinction between specific types of NSAIDs<sup>17</sup>. A Spanish cross sectional, multi-centre study in which 3,357 patients from 713 primary care physicians participated, found that 82% of the NSAID and/or LDASA users with an increased GI risk received PPIs and 62% of the low GI risk patients<sup>20</sup>. So, the vast majority of all NSAID/LDASA users, even the patients with a low risk, received a PPI prescription, which is much higher than observed in our study. Yet, our study has a longitudinal design, and consequently has the information to label a patient as regular or irregular user of PPI. If we drop the strict condition of being a regular PPI user, to mimic a cross-sectional design, 64.5% of the patients with an increased risk obtained PPIs and 50.2% of the low risk patients. These numbers are more in line with the Spanish results, although still lower. Next to the number of

1  
2  
3 increased risk patients receiving PPIs, the timing of the initiation of PPI treatment is  
4 important. Our study showed that the vast majority of patients started with PPI treatment  
5 before or simultaneously with the first prescription of LDASA, thereby acting as preventive  
6 agent.  
7  
8  
9  
10

11  
12  
13  
14 In line with the HARM-WRESTLING recommendations, the US, NICE and ESC guidelines  
15 also recommend to prescribe PPIs to LDASA users who are 60-70 years of age or older  
16 and/or concomitantly use of SSRIs, NSAIDs, or glucocorticosteroids.<sup>12;13;15</sup> Therefore, we  
17 believe our findings are not only relevant for the Netherlands, but have international  
18 implications as well.  
19  
20  
21  
22  
23  
24

25  
26  
27 The study of Lanas *et al.* found that gastroprotective treatment in LDASA users was  
28 significantly associated with a prior history of peptic ulcer, high dose NSAID therapy and  
29 concomitant use of oral corticosteroids and antithrombotics<sup>20</sup>. Our data support these  
30 findings. In several other population-based studies, having a history of GI complications,  
31 including ulcers, is the strongest predictor for receiving a PPI, as is found in our study<sup>6;7;26</sup>.  
32  
33  
34  
35  
36  
37  
38  
39

40 Albeit the number of LDASA users with low GI risk that obtain PPIs is significantly lower  
41 compared to the high risk population, over treatment with PPIs may occur in this group. In  
42 total, 30% of patients with low GI risk received regularly PPI treatment. Although PPI  
43 treatment is considered to be cheap, relatively safe, long-term treatment with this drug has  
44 been shown to increase the susceptibility to GI infections and pneumonia, and it has been  
45 associated with an increased risk of fractures<sup>27-29</sup>. Unfortunately, the reasons why these low  
46 GI risk patients obtained (regular) PPI's by their primary care physician is very incompletely  
47  
48  
49  
50  
51  
52  
53  
54  
55  
56  
57  
58  
59  
60



1  
2  
3 recorded in our database, refraining us to comment on the necessity of these prescriptions in  
4  
5 patients with a low GI risk.  
6  
7

8  
9  
10 The only difference between patients who were at increased GI risk with or without regular  
11  
12 PPI therapy was the reason of being a patient with an increased GI risk; nearly 90% of the  
13  
14 patients who were at increased GI risk without regular PPI therapy were above 80 years,  
15  
16 whereas of the patients with regular PPI use, just 74% was above 80 years. Another possible  
17  
18 explanation why not all patients with an increased GI risk use PPIs regularly might be limited  
19  
20 awareness of primary care physicians of the current recommendation, since the draft version  
21  
22 was first published in 2008 and the final version in 2009, during the first months of our study  
23  
24 period.  
25  
26

27  
28  
29 A strong point of our study is that we had a large representative sample of patients monitored  
30  
31 in daily practice. The vast majority of the primary care centres in the Netherlands have a  
32  
33 computerised EMR, allowing us to use routinely recorded medical and prescription data from  
34  
35 primary care centres minimising the risk of recall bias. The participating primary care centres  
36  
37 are equally distributed throughout the Netherlands and we took possible differences between  
38  
39 practices into account by performing multilevel analyses. Another strength is that in our large  
40  
41 sample, we had complete data for each individual patient, including all physicians' diagnoses  
42  
43 and prescription data. This enabled us to study several different subpopulations of patients  
44  
45 combining LDASA and PPI treatment. Finally, we performed a range of sensitivity analyses  
46  
47 regarding exposure definition, and in- and exclusion criteria.  
48  
49  
50

51  
52  
53 A limitation of this study includes the lack of information about prescriptions by medical  
54  
55 specialists. If PPIs were prescribed by medical specialists, the prescription of the patient  
56  
57  
58  
59  
60

1  
2  
3 might not always appear in our dataset. Yet, the Dutch guidelines for optimising primary care-  
4  
5 medical specialist communication support medical specialists to inform primary care  
6  
7 physicians with the first results of diagnostics and treatments of the referred patient<sup>30,31</sup>. Due  
8  
9 to this, we may have underestimated regular PPI use. However, it is plausible that LDASA  
10  
11 prescription was initiated by the same medical specialist, so if PPI prescriptions are missing,  
12  
13 probably LDASA prescriptions are missing as well. In such a case the patient was not  
14  
15 included in our study, limiting the impact of missing PPI prescriptions. Our results are based  
16  
17 on an observational study which may be subjected to residual confounding due to potential  
18  
19 unmeasured differences in GI risk profile and patient characteristics between LDASA users  
20  
21 who received or did not received PPI prescriptions. Finally, we do not have any information  
22  
23 why patients with an increased GI risk did not obtain PPI prescriptions, nor do we know the  
24  
25 reason why patients become an irregular PPI user, and whether this was patient or physician  
26  
27 related.  
28  
29  
30  
31  
32  
33

34 In conclusion, primary care physicians do not fully adhere to the current recommendations to  
35  
36 prescribe PPIs regularly to LDASA users with an increased GI risk. Despite widespread  
37  
38 recommendations, more than half of the patients with an increased GI risk are not treated  
39  
40 sufficiently with a concomitant PPI, increasing the risk of gastrointestinal side effects. This  
41  
42 finding underlines the necessity to consider merging recommendations into one common,  
43  
44 standard and frequently used recommendation by primary care physicians. Further studies are  
45  
46 needed to determine which motivations and attitudes may play a role for primary care  
47  
48 physicians to be aware of the guidelines and be able to accept, and adhere to them.  
49  
50  
51  
52  
53  
54  
55  
56  
57  
58  
59  
60

**Contributors:**

HJIdJ contributed to the design of the study, performed data analyses and drafted the report. JCK provided data, contributed to the design of the study and the interpretation of the results, and drafted and reviewed the report. LvD initiated and obtained the funding for the project, contributed to the design of the study and interpretation of the results, and drafted and reviewed the paper. EV and ECvD performed data analyses, contributed to the interpretation of the data, and reviewed the paper. MGHvO contributed to the design of the study and analysis plan, and interpretation of the results, and reviewed the paper.

**Conflicts of interest**

This study was funded by Astra Zeneca. The institute of JK and LvD received research funding from Astra Zeneca and Bristol-Myers Squibb for a study not related to this study. MGHvO has served as a consultant for AstraZeneca and Pfizer, and has received unrestricted research grants from AstraZeneca, Shire and Janssen.

**Funding:**

The sponsor of the study, AstraZeneca, had no decisive role in design and conduct of the study, collection, analysis, or interpretation of the data, or decision to submit the manuscript for publication.

JK and LvD had full access to all data in the study and take responsibility for the integrity of the data and accuracy of the data analysis. All authors had final responsibility for the decision to submit for publication

**Data sharing statement:** No additional data are available

**Ethics approval:** The privacy regulation of LINH was approved by the Dutch Data Protection Authority. According to Dutch legislation, neither obtaining informed consent nor approval by a medical ethics committee is obligatory for database studies

**Copyright**

The Corresponding Author has the right to grant on behalf of all authors and does grant on behalf of all authors, a worldwide licence to the Publishers and its licensees in perpetuity, in all forms, formats and media (whether known now or created in the future), to i) publish, reproduce, distribute, display and store the Contribution, ii) translate the Contribution into other languages, create adaptations, reprints, include within collections and create summaries, extracts and/or, abstracts of the Contribution, iii) create any other derivative work(s) based on the Contribution, iv) to exploit all subsidiary rights in the Contribution, v) the inclusion of electronic links from the Contribution to third party material where-ever it may be located; and, vi) licence any third party to do any or all of the above.”

**Table 1. Characteristics of regular low-dose aspirin users with low risk of gastrointestinal complications and low-dose aspirin users with an increased risk of gastrointestinal complications, based upon HARM-wrestling recommendations**

|                                                                                                                                     | Patients with increased risk of GI complications<br>N = 3 213 | Patients with low risk of GI complications<br>N = 9 130 | p-value** |
|-------------------------------------------------------------------------------------------------------------------------------------|---------------------------------------------------------------|---------------------------------------------------------|-----------|
| <b>Risk factors for GI complications at first prescription of LDASA (%)<sup>*,†</sup></b>                                           |                                                               |                                                         |           |
| > 80 years old                                                                                                                      | 2 543 (79.1)                                                  | NA                                                      | NA        |
| > 70 years old and simultaneous use of NSAIDs, oral anticoagulants, glucocorticosteroids, SSRIs and/or spironolacton <sup>‡,§</sup> | 623 (19.4)                                                    | NA                                                      | NA        |
| > 60 years old and history of an ulcer                                                                                              | 47 (1.5)                                                      | NA                                                      | NA        |
| <b>Sex (%)</b>                                                                                                                      |                                                               |                                                         |           |
| Men                                                                                                                                 | 1 283 (39.9)                                                  | 5 352 (58.6)                                            | <0.0001   |
| <b>Age (yrs.) (SD)</b>                                                                                                              | 82.6 (6.1)                                                    | 62.1 (10.8)                                             | <0.0001   |
| <b>LDASA plus PPI use (%)<sup>  </sup></b>                                                                                          |                                                               |                                                         |           |
| No user of PPI                                                                                                                      | 1 142 (35.5)                                                  | 4 541 (49.8)                                            | <0.0001   |
| Regular user of PPI                                                                                                                 | 1 480 (46.1)                                                  | 2 724 (29.8)                                            |           |
| Irregular user of PPI                                                                                                               | 591 (18.4)                                                    | 1 865 (20.4)                                            |           |
| <b>Co-morbidity (%)<sup>†</sup></b>                                                                                                 |                                                               |                                                         |           |
| <b>Gastrointestinal tract</b>                                                                                                       |                                                               |                                                         |           |
| Gastrointestinal complications                                                                                                      | 664 (20.7)                                                    | 1 475 (16.2)                                            | <0.0001   |
| Duodenal ulcer                                                                                                                      | 24 (0.8)                                                      | 21 (0.2)                                                | <0.0001   |
| Peptic ulcer                                                                                                                        | 34 (1.1)                                                      | 11 (0.1)                                                | <0.0001   |
| Hiatus Hernia                                                                                                                       | 29 (0.9)                                                      | 58 (0.6)                                                | 0.13      |
| Heart burn                                                                                                                          | 75 (2.3)                                                      | 233 (2.6)                                               | 0.52      |
| Haematemesis                                                                                                                        | 7 (0.2)                                                       | 10 (0.1)                                                | 0.19      |
| Rectal bleeding                                                                                                                     | 50 (1.6)                                                      | 97 (1.1)                                                | 0.04      |
| <b>Cardiovascular diseases</b>                                                                                                      |                                                               |                                                         |           |
| Cardiovascular diseases**                                                                                                           | 1 584 (49.3)                                                  | 4 196 (46.0)                                            | 0.002     |
| Acute myocardial infarction                                                                                                         | 223 (6.9)                                                     | 792 (8.7)                                               | 0.003     |
| Heart failure                                                                                                                       | 432 (13.5)                                                    | 257 (2.8)                                               | <0.0001   |
| Atrial fibrillation                                                                                                                 | 237 (7.4)                                                     | 509 (5.6)                                               | 0.0003    |
| Ischaemic heart disease w. angina                                                                                                   | 476 (14.8)                                                    | 1 328 (14.6)                                            | 0.72      |
| Ischaemic heart disease w/o angina                                                                                                  | 173 (5.4)                                                     | 638 (7.0)                                               | 0.003     |
| Atherosclerosis                                                                                                                     | 176 (5.5)                                                     | 644 (7.1)                                               | 0.003     |
| Cerebrovascular diseases**                                                                                                          | 756 (23.5)                                                    | 1 480 (16.2)                                            | <0.0001   |
| Stroke                                                                                                                              | 362 (11.3)                                                    | 731 (8.0)                                               | <0.0001   |
| Transient Ischaemic Attack (TIA)                                                                                                    | 326 (10.2)                                                    | 541 (5.9)                                               | <0.0001   |
| Hypertension                                                                                                                        | 1 307 (40.7)                                                  | 3 546 (38.8)                                            | 0.08      |
| Diabetes Mellitus                                                                                                                   | 779 (24.3)                                                    | 1 960 (21.5)                                            | 0.002     |
| Hypercholesteroleamia                                                                                                               | 1 567 (48.8)                                                  | 6 374 (69.8)                                            | <0.0001   |
| <b>Co-medication (%)<sup>†</sup></b>                                                                                                |                                                               |                                                         |           |
| Other drugs for acid related disorders                                                                                              | 196 (6.1)                                                     | 477 (5.2)                                               | 0.07      |
| Drugs for functional gastrointestinal disorders                                                                                     | 277 (8.6)                                                     | 544 (6.0)                                               | <0.0001   |
| Cardiac therapy                                                                                                                     | 964 (30.0)                                                    | 2 152 (23.6)                                            | <0.0001   |
| Antihypertensive agents                                                                                                             | 2 748 (85.5)                                                  | 7 357 (80.6)                                            | <0.0001   |
| Antihypertensives                                                                                                                   | 55 (1.7)                                                      | 171 (1.9)                                               | 0.58      |
| Diuretics                                                                                                                           | 1 594 (49.6)                                                  | 2 456 (26.9)                                            | <0.0001   |

|                           |              |              |         |
|---------------------------|--------------|--------------|---------|
| Beta blocking agents      | 1 728 (53·8) | 5 250 (57·5) | 0·0005  |
| Calcium channel blockers  | 825 (25·7)   | 2 113 (23·1) | 0·005   |
| RAAS agents <sup>††</sup> | 1 672 (52·0) | 4 616 (50·6) | 0·17    |
| Peripheral vasodilators   | 4 (0·1)      | 11 (0·1)     | 1·00    |
| Vasoprotectives           | 103 (3·2)    | 232 (2·5)    | 0·06    |
| Lipid modifying agents    | 1 557 (48·5) | 6 311 (69·1) | <0·0001 |
| Antidiabetics             | 624 (19·4)   | 1 604 (17·6) | 0·03    |

<sup>†</sup>GI: gastrointestinal

<sup>†</sup>LDASA: low-dose acetylsalicylic acid

<sup>\*</sup>NSAIDs: non-steroidal anti-inflammatory drugs

<sup>§</sup>SSRIs: selective serotonin reuptake inhibitors

<sup>||</sup>PPIs: proton pump inhibitors

<sup>¶</sup>Determined in the year before and after the first prescription of LDASA

<sup>\*\*</sup>not all indications are included, only the major ones

<sup>††</sup>RAAS: renin-angiotensin-aldosterone system

<sup>\*\*†</sup>p-values are corrected for multiple testing by using false discovery rate.

**Table 2. Characteristics of regular low-dose aspirin users and low-dose aspirin plus irregular and regular proton pump inhibitors users, stratified by time of proton pump inhibitor use**

|                                                    | No Use of LDASA*<br>N = 5 683 | Irregular use of PPI†<br>N = 2 456 | Regular use of PPI<br>N = 4 204       |                                           |                                         | p-value** |
|----------------------------------------------------|-------------------------------|------------------------------------|---------------------------------------|-------------------------------------------|-----------------------------------------|-----------|
|                                                    |                               |                                    | Previous starters of PPI<br>N = 2 015 | Simultaneous starters of PPI<br>N = 1 064 | Subsequent starters of PPI<br>N = 1 125 |           |
| <b>Age</b>                                         |                               |                                    |                                       |                                           |                                         |           |
| 18-50                                              | 599 (10.5)                    | 208 (8.5)                          | 176 (8.7)                             | 58 (5.4)                                  | 81 (7.2)                                | <0.0001   |
| 51-65                                              | 2 026 (35.7)                  | 829 (33.8)                         | 592 (29.4)                            | 292 (27.4)                                | 331 (29.4)                              |           |
| 66-80                                              | 2 163 (38.1)                  | 1 043 (42.5)                       | 801 (39.8)                            | 424 (39.9)                                | 494 (43.9)                              |           |
| 80+                                                | 895 (15.8)                    | 376 (15.3)                         | 446 (2.1)                             | 290 (27.3)                                | 219 (19.5)                              |           |
| <b>Sex</b>                                         |                               |                                    |                                       |                                           |                                         |           |
| Men                                                | 3 308 (58.2)                  | 1 288 (52.4)                       | 912 (45.3)                            | 530 (49.8)                                | 597 (53.1)                              | <0.0001   |
| <b>Risk of GI complications (%)<sup>‡,  </sup></b> |                               |                                    |                                       |                                           |                                         |           |
| Increased risk of GI complications                 | 1 142 (20.1)                  | 591 (24.1)                         | 756 (37.5)                            | 414 (38.9)                                | 310 (27.6)                              | <0.0001   |
| Low risk of GI complications                       | 4 541 (79.9)                  | 1 865 (75.9)                       | 1 259 (62.5)                          | 650 (61.1)                                | 815 (72.4)                              |           |
| <b>Co-morbidity (%)<sup>§</sup></b>                |                               |                                    |                                       |                                           |                                         |           |
| Gastrointestinal complications                     | 214 (3.8)                     | 594 (24.2)                         | 831 (41.2)                            | 217 (20.4)                                | 283 (25.2)                              | <0.0001   |
| Ulcers                                             | 6 (0.1)                       | 24 (1.0)                           | 38 (1.9)                              | 9 (0.9)                                   | 13 (1.2)                                | <0.0001   |
| Cardiovascular diseases                            | 2 447 (43.6)                  | 1 190 (48.5)                       | 1 110 (55.1)                          | 456 (42.9)                                | 547 (48.6)                              | <0.0001   |
| Cerebrovascular diseases                           | 1 052 (18.5)                  | 400 (16.3)                         | 406 (20.2)                            | 171 (16.1)                                | 207 (18.4)                              | 0.007     |
| Hypertension                                       | 2 221 (39.1)                  | 989 (40.3)                         | 831 (41.2)                            | 335 (31.5)                                | 477 (42.4)                              | <0.0001   |
| Diabetes Mellitus                                  | 1 189 (20.9)                  | 544 (22.2)                         | 458 (22.7)                            | 292 (27.4)                                | 256 (22.8)                              | 0.0001    |
| Hypercholesteroleamia                              | 3 600 (63.4)                  | 1 592 (64.8)                       | 1 302 (64.6)                          | 721 (67.8)                                | 726 (64.5)                              | 0.09      |
| <b>Co-medication (%)<sup>§</sup></b>               |                               |                                    |                                       |                                           |                                         |           |
| Other drugs for acid related disorders             | 227 (4.0)                     | 144 (5.9)                          | 163 (8.1)                             | 54 (5.1)                                  | 85 (7.6)                                | <0.0001   |
| Drugs for functional gastrointestinal disorders    | 151 (2.7)                     | 211 (8.6)                          | 275 (13.7)                            | 83 (7.8)                                  | 101 (9.0)                               | <0.0001   |
| Cardiac therapy                                    | 1 142 (20.1)                  | 664 (27.0)                         | 672 (33.4)                            | 324 (30.5)                                | 314 (27.9)                              | <0.0001   |
| Antihypertensive agents                            | 4 523 (79.6)                  | 1 997 (81.3)                       | 1 721 (85.4)                          | 912 (85.7)                                | 952 (84.6)                              | <0.0001   |
| Antihypertensives                                  | 102 (1.8)                     | 36 (1.5)                           | 44 (2.2)                              | 22 (2.1)                                  | 22 (2.0)                                | 0.48      |
| Diuretics                                          | 1 607 (28.3)                  | 782 (31.8)                         | 826 (41.0)                            | 410 (38.5)                                | 425 (37.8)                              | <0.0001   |
| Beta blocking agents                               | 3 078 (54.2)                  | 1 370 (55.8)                       | 1 255 (62.3)                          | 633 (59.5)                                | 642 (57.1)                              | <0.0001   |
| Calcium channel blockers                           | 1 078 (21.5)                  | 571 (23.3)                         | 551 (27.3)                            | 286 (26.9)                                | 309 (27.5)                              | <0.0001   |
| RAAS agents <sup>¶</sup>                           | 3 221 (49.3)                  | 1 205 (49.6)                       | 1 081 (53.7)                          | 576 (54.1)                                | 624 (55.5)                              | <0.0001   |
| Vasoprotectives                                    | 111 (2.0)                     | 77 (3.1)                           | 84 (4.2)                              | 25 (2.4)                                  | 38 (3.4)                                | <0.0001   |
| Lipid modifying agents                             | 3 568 (62.8)                  | 1 578 (64.3)                       | 1 288 (63.9)                          | 717 (67.4)                                | 717 (63.7)                              | 0.08      |
| Antidiabetics                                      | 974 (17.1)                    | 420 (17.1)                         | 378 (18.8)                            | 244 (22.9)                                | 212 (18.8)                              | 0.0001    |

\*LDASA: low-dose acetylsalicylic acid

†PPIs: proton pump inhibitors

‡Based upon HARM-WRESTLING recommendations: patients who are &gt; 80 years old, or &gt; 70 years old and simultaneous use of non-steroidal anti-inflammatory drugs (NSAIDs), oral anticoagulants, glucocorticosteroids, selective serotonin reuptake inhibitors (SSRIs) and/or spironolacton, or &gt; 60 years old and history of an ulcer.

§Determined in the year before and after the first prescription of LDASA

||GI: gastrointestinal

¶RAAS: renin-angiotensin-aldosterone system

\*\*p-values relate to the comparison of the five groups, and are corrected for multiple testing by using false discovery rate.

**Table 3. The probability of receiving a proton pump inhibitor regularly versus no PPI in patients treated regularly with low-dose aspirin**

|                                                               | LDASA users<br>(N = 9 887) <sup>†</sup>             |                                          |                       |
|---------------------------------------------------------------|-----------------------------------------------------|------------------------------------------|-----------------------|
|                                                               | Univariate<br>analysis<br>(OR; 95% CI) <sup>†</sup> | Multivariate<br>analysis<br>(OR; 95% CI) | p-value <sup>  </sup> |
| Age (ref = 18-50)                                             |                                                     |                                          |                       |
| 51-65                                                         | 1.28 (1.13 – 1.46)                                  | 1.09 (0.91 – 1.31)                       | 0.39                  |
| 66-80                                                         | 1.77 (1.56 – 2.00)                                  | 1.54 (1.28 – 1.84)                       | <0.0001               |
| 80+                                                           | 2.16 (1.88 – 2.48)                                  | 1.88 (1.54 – 2.30)                       | <0.0001               |
| Gender (ref = male)                                           | 1.48 (1.38 – 1.59)                                  | 1.26 (1.15 – 1.39)                       | <0.0001               |
| Increased risk of GI complications (ref = low) <sup>‡,§</sup> | 2.15 (1.99 – 2.33)                                  |                                          |                       |
| NSAIDs                                                        | 4.05 (3.72 – 4.41)                                  | 5.20 (4.31 – 6.28)                       | <0.0001               |
| Oral anticoagulants                                           | 1.48 (1.30 – 1.68)                                  | 1.46 (1.12 – 1.90)                       | 0.008                 |
| Glucocorticosteroids                                          | 4.39 (3.92 – 4.91)                                  | 6.06 (4.59 – 7.99)                       | <0.0001               |
| SSRIs                                                         | 5.88 (4.95 – 6.99)                                  | 9.07 (6.73 – 12.22)                      | <0.0001               |
| Spironolacton                                                 | 2.46 (2.04 – 2.96)                                  | 1.64 (1.22 – 2.22)                       | 0.002                 |
| Ulcer                                                         | 13.09 (6.75 – 25.40)                                |                                          |                       |
| Gastrointestinal complications                                | 14.88 (13.08 – 16.93)                               | 13.89 (11.78 – 16.37)                    | <0.0001               |
| Cardiovascular diseases                                       | 1.37 (1.27 – 1.47)                                  |                                          |                       |
| Cerebrovascular diseases                                      | 0.98 (0.89 – 1.07)                                  |                                          |                       |
| Hypertension                                                  | 1.13 (1.05 – 1.22)                                  | 0.83 (0.75 – 0.92)                       | 0.001                 |
| Diabetes Mellitus                                             | 1.21 (1.11 – 1.31)                                  |                                          |                       |
| Hypercholesterolemia                                          | 1.19 (1.11 – 1.28)                                  | 1.19 (1.07 – 1.32)                       | 0.003                 |
| Other drugs for acid related disorders                        | 1.84 (1.58 – 2.13)                                  |                                          |                       |
| Drugs for functional gastrointestinal disorders               | 4.62 (3.96 – 5.40)                                  | 2.40 (1.92 – 3.00)                       | <0.0001               |
| Cardiac therapy                                               | 1.85 (1.71 – 2.00)                                  | 1.55 (1.39 – 1.73)                       | <0.0001               |
| Antihypertensive agents                                       | 1.62 (1.48 – 1.77)                                  | 1.34 (1.17 – 1.55)                       | <0.0001               |
| Vasoprotectives                                               | 1.91 (1.55 – 2.33)                                  | 1.42 (1.06 – 1.91)                       | 0.03                  |
| Lipid modifying agents                                        | 1.18 (1.10 – 1.27)                                  |                                          |                       |
| Antidiabetics                                                 | 1.22 (1.11 – 1.33)                                  | 1.11 (0.98 – 1.26)                       | 0.1                   |

<sup>\*</sup>LDASA: low-dose acetylsalicylic acid, limited to the No use of PPI and regular users of PPI

<sup>†</sup>OR: odds ratio, CI: confidence interval

<sup>‡</sup>GI: gastrointestinal

<sup>§</sup>Based upon HARM-WRESTLING recommendations: patients who are > 80 years old, or > 70 years old and simultaneous use of non-steroidal anti-inflammatory drugs (NSAIDs), oral anticoagulants, glucocorticosteroids, selective serotonin reuptake inhibitors (SSRIs) and/or spironolacton, or > 60 years old and history of an ulcer.

<sup>||</sup>p-values presented are for the multivariate analyses and are corrected for multiple testing by using false discovery rate.



1  
2  
3 **Figure 1. Study flow diagram**  
4

5 LDASA, low-dose acetylsalicylic acid; GI, gastrointestinal; PPI, proton pump inhibitors; reg., regular; irreg.,  
6 irregular  
7  
8  
9  
10

11  
12  
13  
14  
15  
16  
17 **Reference List**  
18

- 19 (1) World Health Organisation. Global atlas on cardiovascular disease prevention and  
20 control. 10-1-2012.  
21  
22  
23 (2) Antithrombotic Trialists' Collaboration. Collaborative meta-analysis of randomised  
24 trials of antiplatelet therapy for prevention of death, myocardial infarction, and stroke  
25 in high risk patients. *BMJ* 2002; 324(7329):71-86.  
26  
27 (3) Baigent C, Blackwell L, Collins R, Emberson J, Godwin J, Peto R et al. Aspirin in the  
28 primary and secondary prevention of vascular disease: collaborative meta-analysis of  
29 individual participant data from randomised trials. *Lancet* 2009; 373(9678):1849-  
30 1860.  
31  
32 (4) Chen ZM, Sandercock P, Pan HC, Counsell C, Collins R, Liu LS et al. Indications for  
33 early aspirin use in acute ischemic stroke : A combined analysis of 40 000 randomized  
34 patients from the chinese acute stroke trial and the international stroke trial. On behalf  
35 of the CAST and IST collaborative groups. *Stroke* 2000; 31(6):1240-1249.  
36  
37 (5) Wolff T, Miller T, Ko S. Aspirin for the primary prevention of cardiovascular events:  
38 an update of the evidence for the U.S. Preventive Services Task Force. *Ann Intern*  
39 *Med* 2009; 150(6):405-410.  
40  
41 (6) McQuaid KR, Laine L. Systematic review and meta-analysis of adverse events of low-  
42 dose aspirin and clopidogrel in randomized controlled trials. *Am J Med* 2006;  
43 119(8):624-638.  
44  
45 (7) Yeomans ND, Lanas AI, Talley NJ, Thomson AB, Daneshjoo R, Eriksson B et al.  
46 Prevalence and incidence of gastroduodenal ulcers during treatment with vascular  
47 protective doses of aspirin. *Aliment Pharmacol Ther* 2005; 22(9):795-801.  
48  
49 (8) Hsiao FY, Tsai YW, Huang WF, Wen YW, Chen PF, Chang PY et al. A comparison  
50 of aspirin and clopidogrel with or without proton pump inhibitors for the secondary  
51 prevention of cardiovascular events in patients at high risk for gastrointestinal  
52 bleeding. *Clin Ther* 2009; 31(9):2038-2047.  
53  
54  
55  
56  
57  
58  
59  
60

- 1  
2  
3 (9) Ng FH, Wong SY, Lam KF, Chu WM, Chan P, Ling YH et al. Famotidine is inferior  
4 to pantoprazole in preventing recurrence of aspirin-related peptic ulcers or erosions.  
5 *Gastroenterology* 2010; 138(1):82-88.  
6
- 7 (10) Scheiman JM, Devereaux PJ, Herlitz J, Katelaris PH, Lanas A, Veldhuyzen vZ et al.  
8 Prevention of peptic ulcers with esomeprazole in patients at risk of ulcer development  
9 treated with low-dose acetylsalicylic acid: a randomised, controlled trial (OBERON).  
10 *Heart* 2011; 97(10):797-802.  
11
- 12 (11) Yeomans ND. Reducing the risk of gastroduodenal ulcers with a fixed combination of  
13 esomeprazole and low-dose acetyl salicylic acid. *Expert Rev Gastroenterol Hepatol*  
14 2011; 5(4):447-455.  
15
- 16 (12) Bhatt DL, Scheiman J, Abraham NS, Antman EM, Chan FK, Furberg CD et al.  
17 ACCF/ACG/AHA 2008 expert consensus document on reducing the gastrointestinal  
18 risks of antiplatelet therapy and NSAID use: a report of the American College of  
19 Cardiology Foundation Task Force on Clinical Expert Consensus Documents.  
20 *Circulation* 2008; 118(18):1894-1909.  
21
- 22 (13) Hamm CW, Bassand JP, Agewall S, Bax J, Boersma E, Bueno H et al. ESC  
23 Guidelines for the management of acute coronary syndromes in patients presenting  
24 without persistent ST-segment elevation: The Task Force for the management of acute  
25 coronary syndromes (ACS) in patients presenting without persistent ST-segment  
26 elevation of the European Society of Cardiology (ESC). *Eur Heart J* 2011;  
27 32(23):2999-3054.  
28
- 29 (14) Ministerie van Volksgezondheid WeS. Een voorstel van de Expertgroep  
30 Medicatieveiligheid met betrekking tot concrete interventies die de extramurale  
31 medicatieveiligheid op korte termijn kunnen verbeteren. HARM-WRESTLING.  
32 2009. Den Haag, The Netherlands.  
33
- 34 (15) NICE. Acute upper gastrointestinal bleedings: management. NICE clinical guideline  
35 141. 2012.  
36
- 37 (16) Abraham NS, Hlatky MA, Antman EM, Bhatt DL, Bjorkman DJ, Clark CB et al.  
38 ACCF/ACG/AHA 2010 expert consensus document on the concomitant use of proton  
39 pump inhibitors and thienopyridines: a focused update of the ACCF/ACG/AHA 2008  
40 expert consensus document on reducing the gastrointestinal risks of antiplatelet  
41 therapy and NSAID use. A Report of the American College of Cardiology Foundation  
42 Task Force on Expert Consensus Documents. *J Am Coll Cardiol* 2010; 56(24):2051-  
43 2066.  
44
- 45 (17) Valkhoff VE, van Soest EM, Sturkenboom MC, Kuipers EJ. Time-trends in  
46 gastroprotection with nonsteroidal anti-inflammatory drugs (NSAIDs). *Aliment*  
47 *Pharmacol Ther* 2010; 31(11):1218-1228.  
48
- 49 (18) Hartnell NR, Flanagan PS, Mackinnon NJ, Bakowsky VS. Use of gastrointestinal  
50 preventive therapy among elderly persons receiving antiarthritic agents in Nova  
51 Scotia, Canada. *Am J Geriatr Pharmacother* 2004; 2(3):171-180.  
52  
53  
54  
55  
56  
57  
58  
59  
60

- 1  
2  
3 (19) Sturkenboom MC, Burke TA, Dieleman JP, Tangelder MJ, Lee F, Goldstein JL.  
4 Underutilization of preventive strategies in patients receiving NSAIDs. *Rheumatology*  
5 (*Oxford*) 2003; 42 Suppl 3:iii23-iii31.  
6  
7 (20) Lanas A, Plazas MA, Gimeno E, Munoz-Tuduri M. Gastroprotection in NSAID and  
8 low-dose aspirin users: a cross-sectional study in primary care. *Gastroenterol Hepatol*  
9 2012; 35(1):1-7.  
10  
11 (21) Bianco MA, Rotondano G, Buri L, Tessari F, Cipolletta L. Gastro-protective strategies  
12 in primary care in Italy: the "Gas.Pro." survey. *Dig Liver Dis* 2010; 42(5):359-364.  
13  
14 (22) Stirbu-Wagner I, Dorsman SA, Visscher S, Davids R, Gravenstein JV, Abrahamse H  
15 et al. Netherlands Information Network of General Practice (LINH). 2012. Utrecht /  
16 Nijmegen, NIVEL/IQ.  
17  
18  
19  
20 (23) Schellevis FG, Westert GP, De Bakker DH. [The actual role of general practice in the  
21 dutch health-care system. Results of the second dutch national survey of general  
22 practice]. *Med Klin (Munich)* 2005; 100(10):656-661.  
23  
24 (24) World Health Organisation. Guidelines for ATC classification and DDD assignment.  
25 Oslo: WHO Collaborating Centre for Drug Statistics Methodology - Nordic Council  
26 on Medicines; 1999.  
27  
28 (25) Lamberts H, Wood M. ICPC. International Classification of Primary Care. Oxford:  
29 Oxford University Press; 1987.  
30  
31 (26) Derry S, Loke YK. Risk of gastrointestinal haemorrhage with long term use of aspirin:  
32 meta-analysis. *BMJ* 2000; 321(7270):1183-1187.  
33  
34 (27) Leonard J, Marshall JK, Moayyedi P. Systematic review of the risk of enteric infection  
35 in patients taking acid suppression. *Am J Gastroenterol* 2007; 102(9):2047-2056.  
36  
37 (28) Laheij RJ, Sturkenboom MC, Hassing RJ, Dieleman J, Stricker BH, Jansen JB. Risk  
38 of community-acquired pneumonia and use of gastric acid-suppressive drugs. *JAMA*  
39 2004; 292(16):1955-1960.  
40  
41 (29) Yang YX, Lewis JD, Epstein S, Metz DC. Long-term proton pump inhibitor therapy  
42 and risk of hip fracture. *JAMA* 2006; 296(24):2947-2953.  
43  
44 (30) Richtlijn overdracht van medicatie gegevens in de keten. 2008. VWS and IGZ.  
45  
46 (31) Kvamme OJ, Olesen F, Samuelson M. Improving the interface between primary and  
47 secondary care: a statement from the European Working Party on Quality in Family  
48 Practice (EQUIP). *Qual Health Care* 2001; 10(1):33-39.  
49  
50  
51  
52  
53  
54  
55  
56  
57  
58  
59  
60

1  
2  
3  
4  
5  
6  
7  
8  
9  
10  
11  
12  
13  
14  
15  
16  
17  
18  
19  
20  
21  
22  
23  
24  
25  
26  
27  
28  
29  
30  
31  
32  
33  
34  
35  
36  
37  
38  
39  
40  
41  
42  
43  
44  
45  
46  
47  
48  
49  
50  
51  
52  
53  
54  
55  
56  
57  
58  
59  
60

Figure 1. Study flow diagram

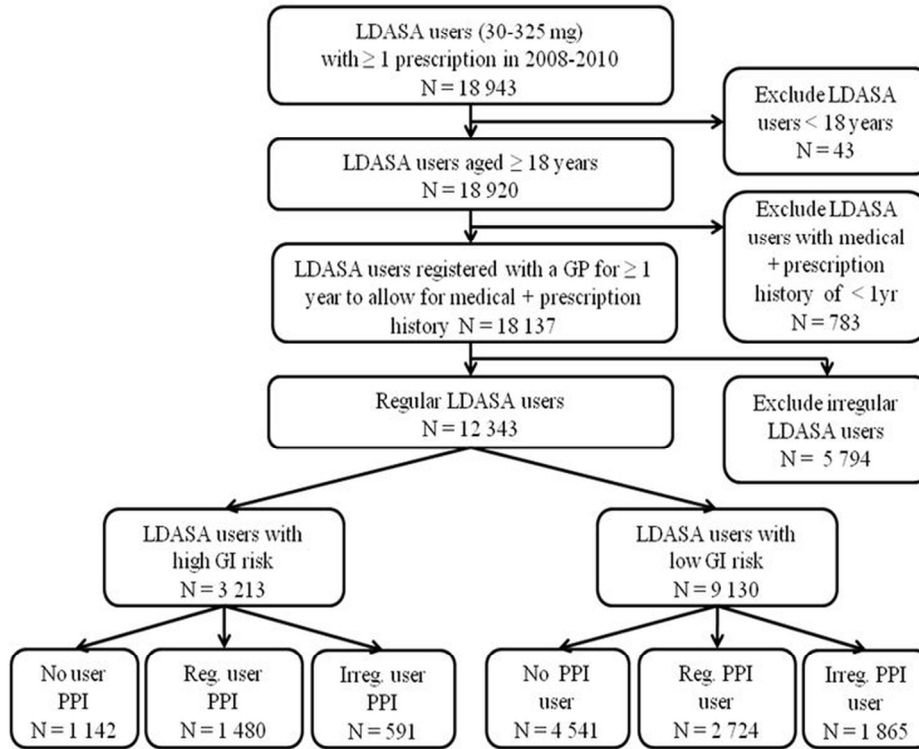

LDASA, low-dose acetylsalicylic acid; GI, gastrointestinal; PPI, proton pump inhibitors; reg., regular; irreg., irregular

96x90mm (300 x 300 DPI)

only

**Appendix I. The definitions and ICPC- and ATC-codes for co-morbidity**

| Co-morbidity            | At least one medical record of diseases before and after the first prescription of LDASA (ICPC-codes)                                                                                                                                                                                                                                                                                                                                                                                                                                                                                           | At least one prescription of drugs before and after the first prescription of LDASA (ATC-codes) |
|-------------------------|-------------------------------------------------------------------------------------------------------------------------------------------------------------------------------------------------------------------------------------------------------------------------------------------------------------------------------------------------------------------------------------------------------------------------------------------------------------------------------------------------------------------------------------------------------------------------------------------------|-------------------------------------------------------------------------------------------------|
| Diabetes                | Diabetes (T90)                                                                                                                                                                                                                                                                                                                                                                                                                                                                                                                                                                                  | Insulin (A10A), Oral blood glucose lowering drugs (A10B)                                        |
| Hypertension            | Hypertension uncomplicated (K86), Hypertension complicated (K87)                                                                                                                                                                                                                                                                                                                                                                                                                                                                                                                                |                                                                                                 |
| Hyperlipidaemia         | Lipid disorder (T93)                                                                                                                                                                                                                                                                                                                                                                                                                                                                                                                                                                            | Lipid modifying agents (C10)                                                                    |
| GI complications        | Abdominal pain epigastric (D02), Heartburn (D03), Nausea (D09), Vomiting (D10), Haematemesis/ vomiting blood (D14), Rectal bleeding (D16), Duodenal ulcer (D85), Peptic ulcer other (D86), Stomach function disorder (D87), Hiatus hernia (D90)                                                                                                                                                                                                                                                                                                                                                 |                                                                                                 |
| Cardio-vascular Disease | Heart disease (K71), Congenital anomaly cardiovascular (K73), Ischaemic heart disease w. angina (K74), Acute myocardial infarction (K75), Ischaemic heart disease w/o angina (K76), Heart failure (K77), Atrial fibrillation/ flutter (K78), Paroxysmal tachycardia (K79), Cardiac arrhythmia (K80), Heart/ arterial murmur (K81), Pulmonary heart disease (K82), Heart valve disease (K83), Heart disease other (K84), Atherosclerosis (K92), Pulmonary embolism (K93), Phlebitis/ thrombophlebitis (K94), Varicose veins of leg (K95), Haemorrhoids (K96), Cardiovascular disease other (K99) |                                                                                                 |
| Cerebrovascular Disease | Transient cerebral ischaemia (K89), Stroke/cerebrovascular accident (K90), Cerebrovascular disease (K91)                                                                                                                                                                                                                                                                                                                                                                                                                                                                                        |                                                                                                 |

STROBE Statement—Checklist of items that should be included in reports of *cohort studies*

| Page                |                              | Item No | Recommendation                                                                                                                                                                                    |
|---------------------|------------------------------|---------|---------------------------------------------------------------------------------------------------------------------------------------------------------------------------------------------------|
| 1                   | <b>Title and abstract</b>    | 1       | (a) Indicate the study's design with a commonly used term in the title or the abstract                                                                                                            |
| 2+3                 |                              |         | (b) Provide in the abstract an informative and balanced summary of what was done and what was found                                                                                               |
| <b>Introduction</b> |                              |         |                                                                                                                                                                                                   |
| 5+6                 | Background/rationale         | 2       | Explain the scientific background and rationale for the investigation being reported                                                                                                              |
| 6                   | Objectives                   | 3       | State specific objectives, including any prespecified hypotheses                                                                                                                                  |
| <b>Methods</b>      |                              |         |                                                                                                                                                                                                   |
| 7                   | Study design                 | 4       | Present key elements of study design early in the paper                                                                                                                                           |
| 7                   | Setting                      | 5       | Describe the setting, locations, and relevant dates, including periods of recruitment, exposure, follow-up, and data collection                                                                   |
| 7                   | Participants                 | 6       | (a) Give the eligibility criteria, and the sources and methods of selection of participants. Describe methods of follow-up                                                                        |
| n.a.                |                              |         | (b) For matched studies, give matching criteria and number of exposed and unexposed                                                                                                               |
| 7-9                 | Variables                    | 7       | Clearly define all outcomes, exposures, predictors, potential confounders, and effect modifiers. Give diagnostic criteria, if applicable                                                          |
| 7-10                | Data sources/<br>measurement | 8*      | For each variable of interest, give sources of data and details of methods of assessment (measurement). Describe comparability of assessment methods if there is more than one group              |
| 10                  | Bias                         | 9       | Describe any efforts to address potential sources of bias                                                                                                                                         |
| 7                   | Study size                   | 10      | Explain how the study size was arrived at                                                                                                                                                         |
| 7-10                | Quantitative variables       | 11      | Explain how quantitative variables were handled in the analyses. If applicable, describe which groupings were chosen and why                                                                      |
| 9+10                | Statistical methods          | 12      | (a) Describe all statistical methods, including those used to control for confounding                                                                                                             |
| 10                  |                              |         | (b) Describe any methods used to examine subgroups and interactions                                                                                                                               |
| 10                  |                              |         | (c) Explain how missing data were addressed                                                                                                                                                       |
| n.a.                |                              |         | (d) If applicable, explain how loss to follow-up was addressed                                                                                                                                    |
| 10                  |                              |         | (e) Describe any sensitivity analyses                                                                                                                                                             |
| <b>Results</b>      |                              |         |                                                                                                                                                                                                   |
|                     | Participants                 | 13*     | (a) Report numbers of individuals at each stage of study—eg numbers potentially eligible, examined for eligibility, confirmed eligible, included in the study, completing follow-up, and analysed |
| 11                  |                              |         | (b) Give reasons for non-participation at each stage                                                                                                                                              |
| Fig 1               |                              |         | (c) Consider use of a flow diagram                                                                                                                                                                |
| Fig 1               |                              |         |                                                                                                                                                                                                   |
|                     | Descriptive data             | 14*     | (a) Give characteristics of study participants (eg demographic, clinical, social) and information on exposures and potential confounders                                                          |
| Table 1             |                              |         | (b) Indicate number of participants with missing data for each variable of interest                                                                                                               |
| n.a.                |                              |         | (c) Summarise follow-up time (eg, average and total amount)                                                                                                                                       |
| 7                   |                              |         |                                                                                                                                                                                                   |

|    |        |                          |     |                                                                         |
|----|--------|--------------------------|-----|-------------------------------------------------------------------------|
| 1  | Fig 1  | Outcome data             | 15* | Report numbers of outcome events or summary measures over time          |
| 2  | 11-12  | Main results             | 16  | (a) Give unadjusted estimates and, if applicable, confounder-           |
| 3  |        |                          |     | adjusted estimates and their precision (eg, 95% confidence interval).   |
| 4  |        |                          |     | Make clear which confounders were adjusted for and why they were        |
| 5  |        |                          |     | included                                                                |
| 6  |        |                          |     |                                                                         |
| 7  | Tables |                          |     | (b) Report category boundaries when continuous variables were           |
| 8  |        |                          |     | categorized                                                             |
| 9  |        |                          |     |                                                                         |
| 10 |        |                          |     | (c) If relevant, consider translating estimates of relative risk into   |
| 11 |        |                          |     | absolute risk for a meaningful time period                              |
| 12 | 12     | Other analyses           | 17  | Report other analyses done—eg analyses of subgroups and                 |
| 13 |        |                          |     | interactions, and sensitivity analyses                                  |
| 14 |        |                          |     |                                                                         |
| 15 |        | <b>Discussion</b>        |     |                                                                         |
| 16 | 13     | Key results              | 18  | Summarise key results with reference to study objectives                |
| 17 | 15-16  | Limitations              | 19  | Discuss limitations of the study, taking into account sources of        |
| 18 |        |                          |     | potential bias or imprecision. Discuss both direction and magnitude     |
| 19 |        |                          |     | of any potential bias                                                   |
| 20 | 16     | Interpretation           | 20  | Give a cautious overall interpretation of results considering           |
| 21 |        |                          |     | objectives, limitations, multiplicity of analyses, results from similar |
| 22 |        |                          |     | studies, and other relevant evidence                                    |
| 23 |        |                          |     |                                                                         |
| 24 | 16     | Generalisability         | 21  | Discuss the generalisability (external validity) of the study results   |
| 25 |        |                          |     |                                                                         |
| 26 |        | <b>Other information</b> |     |                                                                         |
| 27 | 17     | Funding                  | 22  | Give the source of funding and the role of the funders for the present  |
| 28 |        |                          |     | study and, if applicable, for the original study on which the present   |
| 29 |        |                          |     | article is based                                                        |
| 30 |        |                          |     |                                                                         |

\*Give information separately for exposed and unexposed groups.

**Note:** An Explanation and Elaboration article discusses each checklist item and gives methodological background and published examples of transparent reporting. The STROBE checklist is best used in conjunction with this article (freely available on the Web sites of PLoS Medicine at <http://www.plosmedicine.org/>, Annals of Internal Medicine at <http://www.annals.org/>, and Epidemiology at <http://www.epidem.com/>). Information on the STROBE Initiative is available at <http://www.strobe-statement.org>.
